# Supplementary material
Source: PubMed Central journal article supplement (PMC2775832)
Supplement: mmc1.pdf [file mmc1.pdf]

## **Supplemental Data**

### **Gene-centric Association Signals for Lipids**

### **and Apolipoproteins Identified**

### **via the HumanCVD BeadChip**

**Philippa J. Talmud, Fotios Drenos, Sonia Shah, Tina Shah, Jutta Palmen, Claudio Verzilli, Tom R. Gaunt, Jacky Pallas, Ruth Lovering, Kawah Li, Juan Pablo Casas, Reecha Sofat, Meena Kumari, Santiago Rodriguez, Toby Johnson, Stephen J. Newhouse, Anna Dominiczak, Nilesh J. Samani, Mark Caulfield, Peter Sever, Alice Stanton, Denis C. Shields on behalf of the ASCOT investigators, Sandosh Padmanabhan, Olle Melander, Claire Hastie, Christian Delles on behalf of the NORDIL investigators, Shah Ebrahim, Michael G. Marmot, George Davey Smith, Debbie A. Lawlor, Patricia B. Munroe for the BRIGHT Consortium, Ian N. Day, Mika Kivimaki, John Whittaker, Steve E. Humphries, and Aroon D. Hingorani**

Figure S1. Population Structure

ANALYSIS 1: A multidimensional scaling plot based on the pairwise Identity-By-State distances of all QC-passed samples (5441) and SNPs (48032)

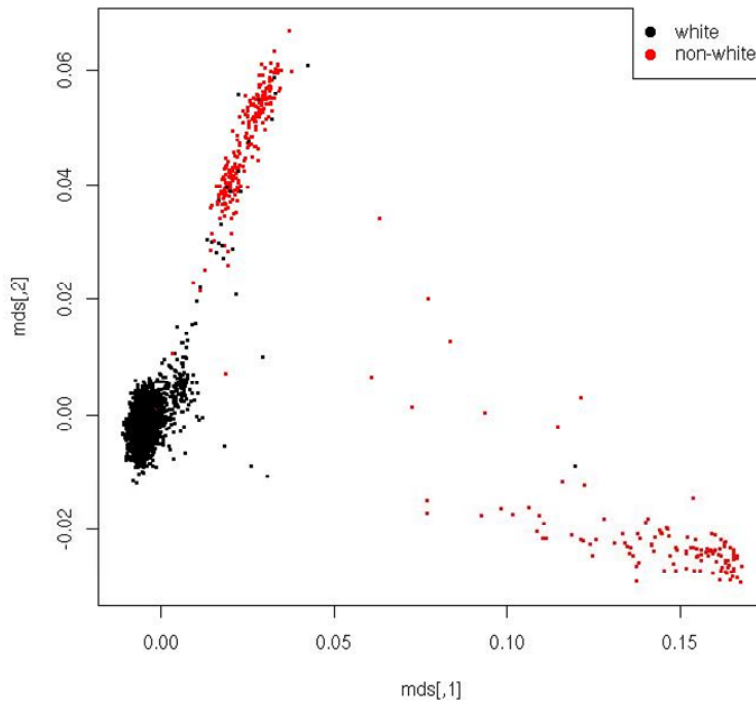

ANALYSIS 2: A multidimensional scaling plot based on the pairwise Identity-By-State distances of Caucasian samples (5067), showing 8 outliers circled in red.

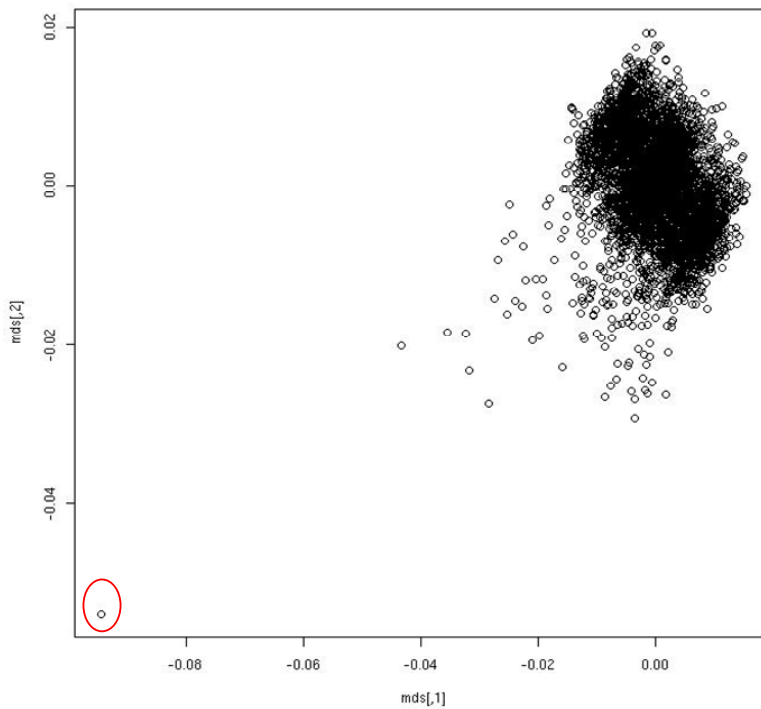

Figure S2 . Heat plot reflecting the relationship between the five traits with SNPs that that were significant at the cut-off of  $10^{-5}$  for at least one of the traits. White shows the strongest association m, red the weakest.

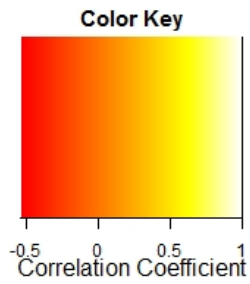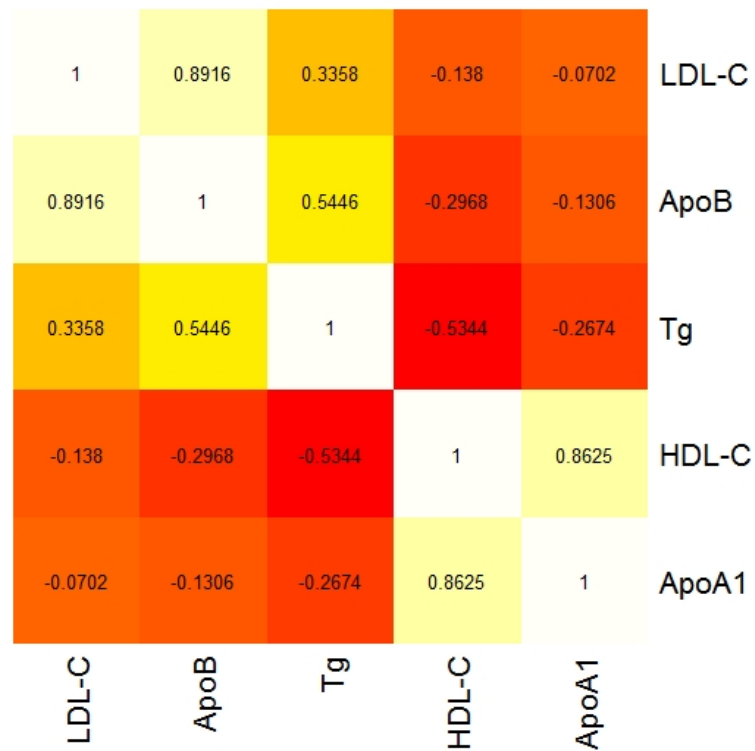

**Figure S3a**

Haploview plots for ApoB showing the SNPs significant by univariate analysis (at  $p < 10^{-5}$ ) and those retained after variable selection (red boxes). For the Chromosome 19 *APOE* locus those SNPs in orange are no longer retained when the *APOE* rs429358 and rs7412 defining the common alleles were included into the analysis

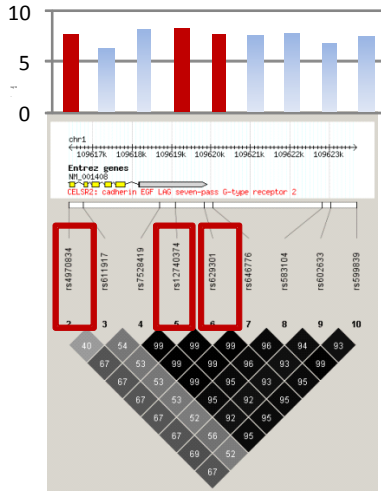

**Chr1 *CELSR2***

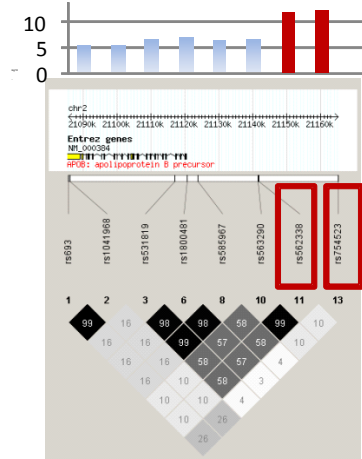

**Chr2 *APOB***

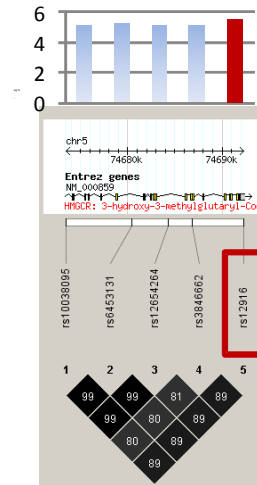

**Chr5 *HMGR***

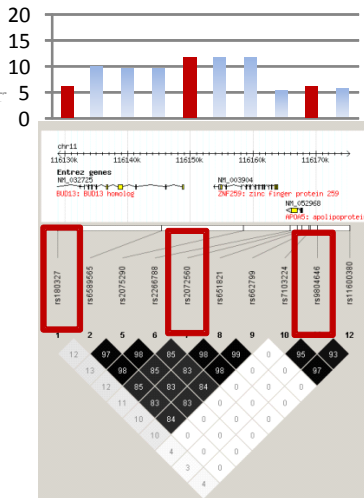

**Chr11 *BUD13/ZNF259/APOA5***

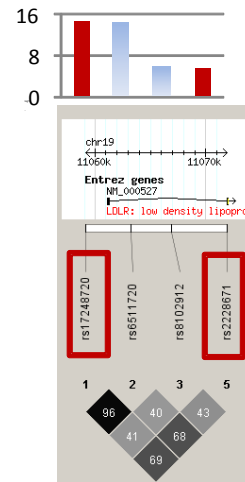

**Chr19 *LDLR***

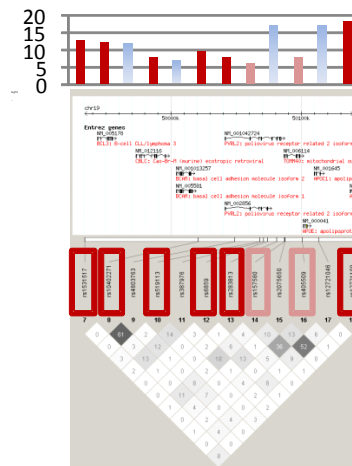

**Chr19 *APOE* cluster**

Figure S3b. Haploview plots for ApoAI showing the SNPs significant by univariate analysis (at  $p < 10^{-5}$ ) and those retained after variable selection (red boxes)

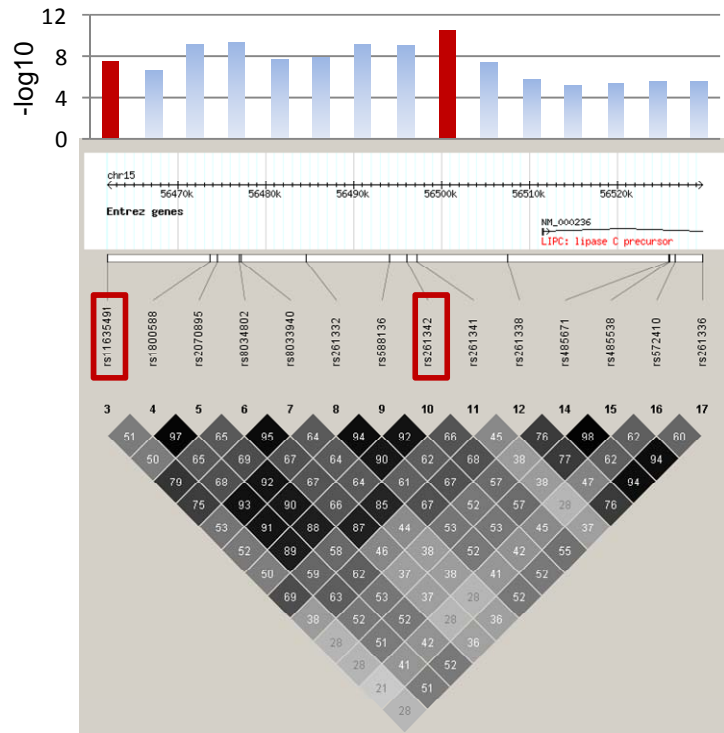

Chr15 *LIPC*

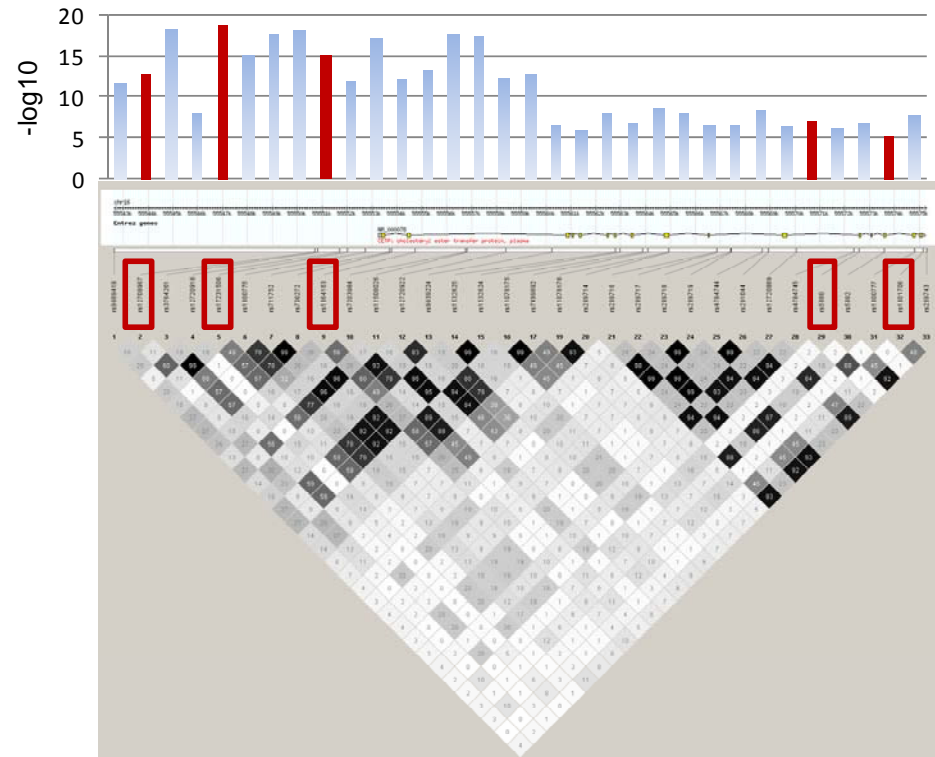

Chr16

Figure S4. Frequency distribution of the gene count score and the effect of gene score on a) HDL-C, b) ApoAI, c) apoB, d) apoB/apoAI. The odds ratio for occupancy of the extreme 10% of the trait distribution at different cut points of the respective gene score distributions are presented below each histogram. The medians (interquartile ranges) of the gene counts were 28 (26-30) for apoB, 12 (10-14) for HDL-C, 10 (8-11) for apoAI, and 25 (24-26) for apoB/apoAI.

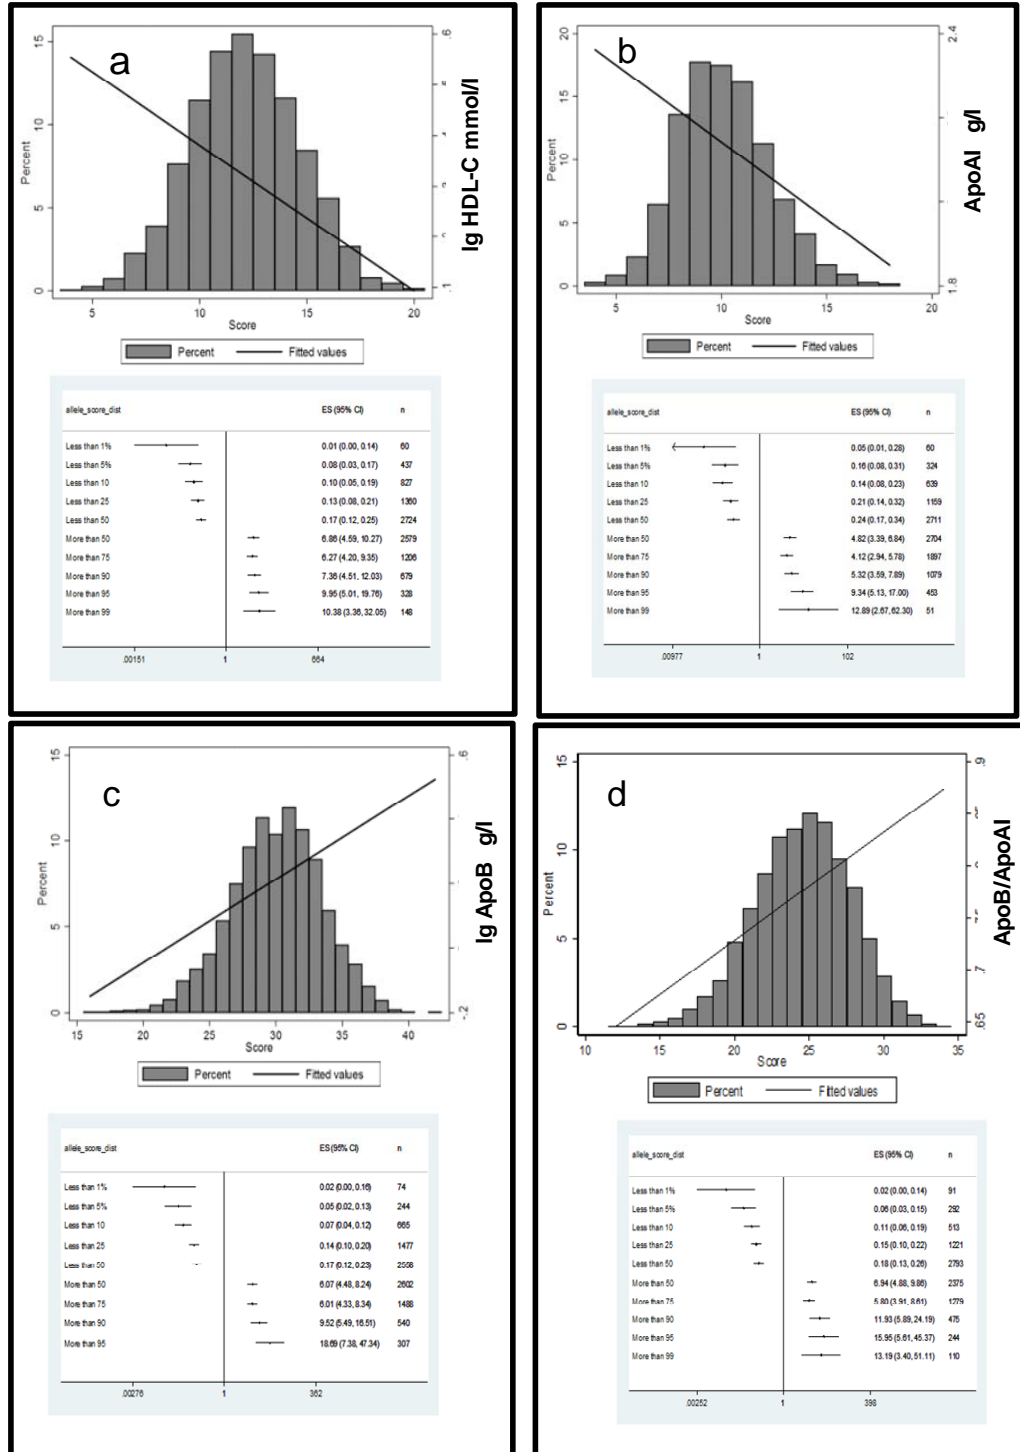

Figure S5a-d The figures shows the SNP coverage of the IBC CVD chip compared to the Illumina 550K, Illumina 300K and Affy5.0 GWAS chips using the UCSC Genome Browser (<http://genome.ucsc.edu/>). The IBC CVD chip has much denser coverage for loci with a high likelihood of functional significance and candidate loci that are potentially involved in phenotypes of interest

a) *SH2B3* locus

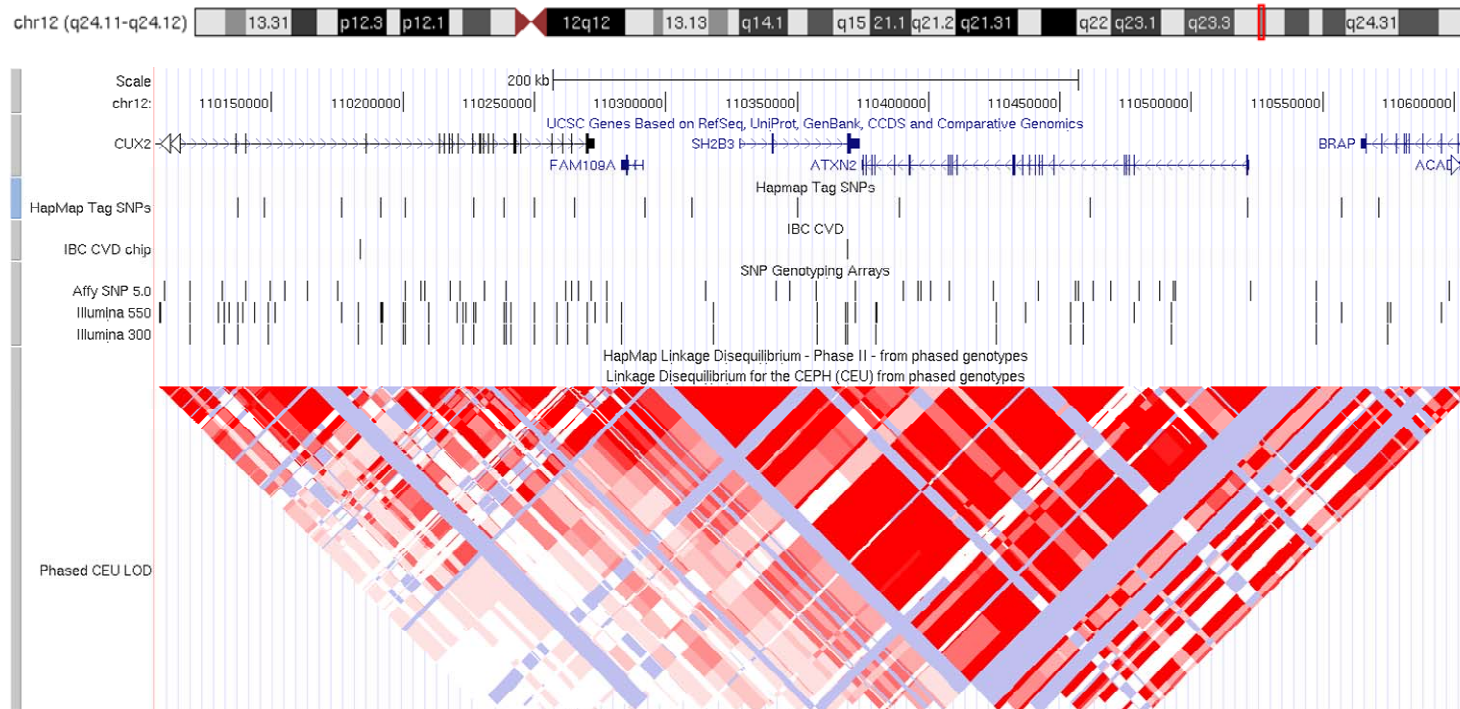

chr12:110,105,771-110,608,345

b) *APOE* locus

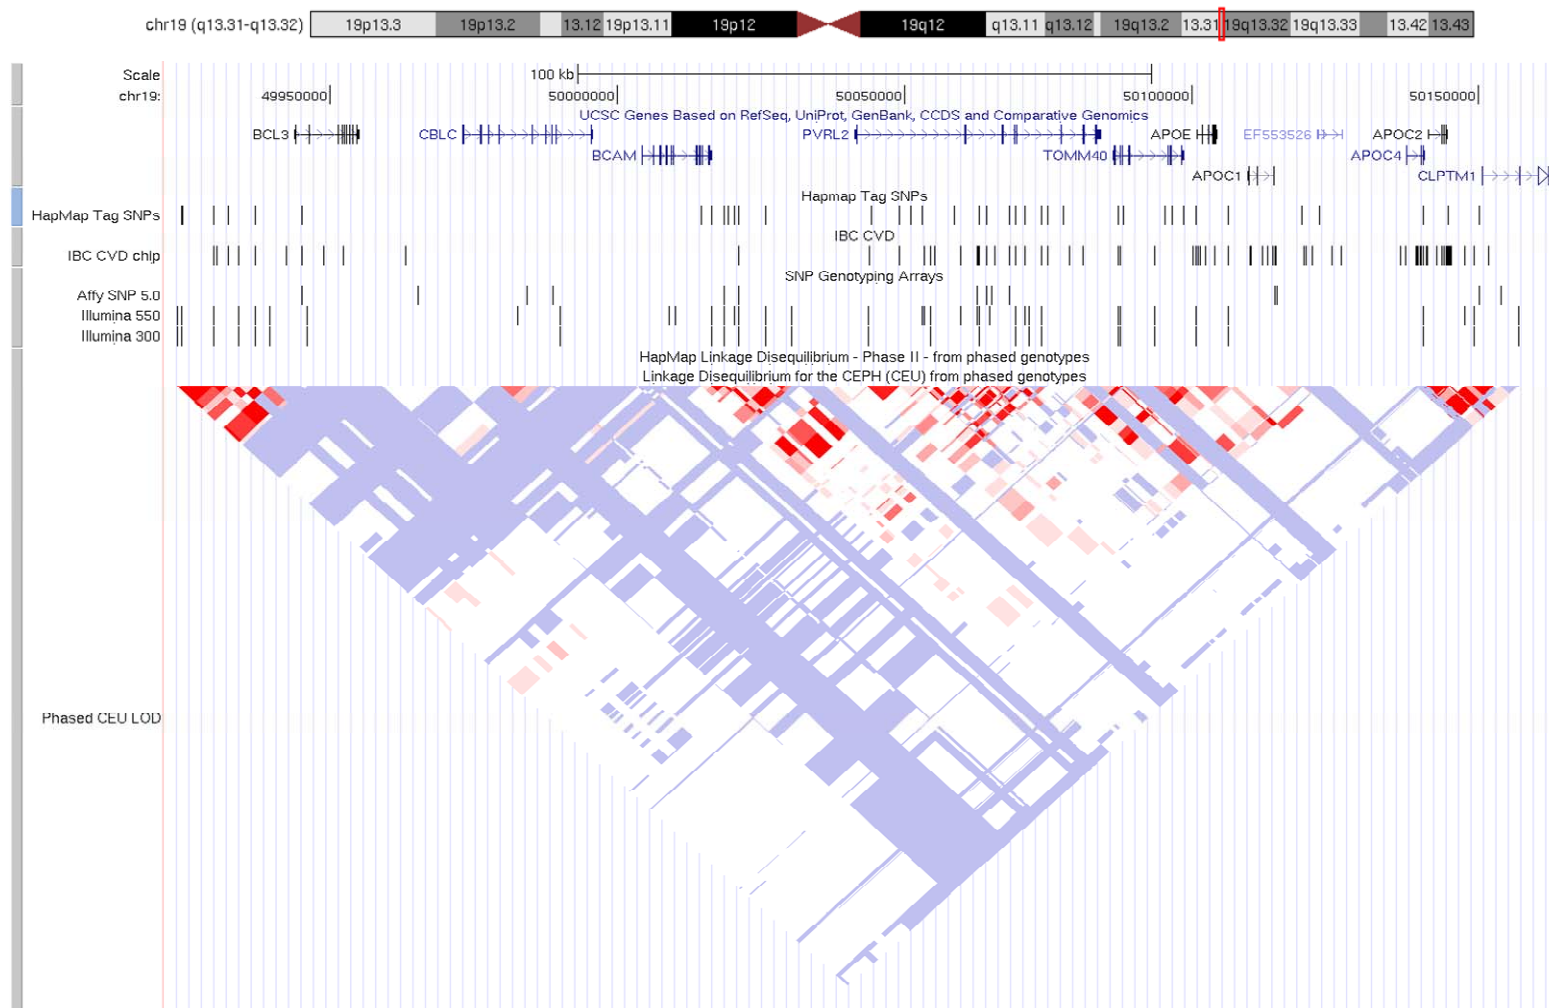

Chr19:49,921,182-50,164,991



c) *LDLR* locus

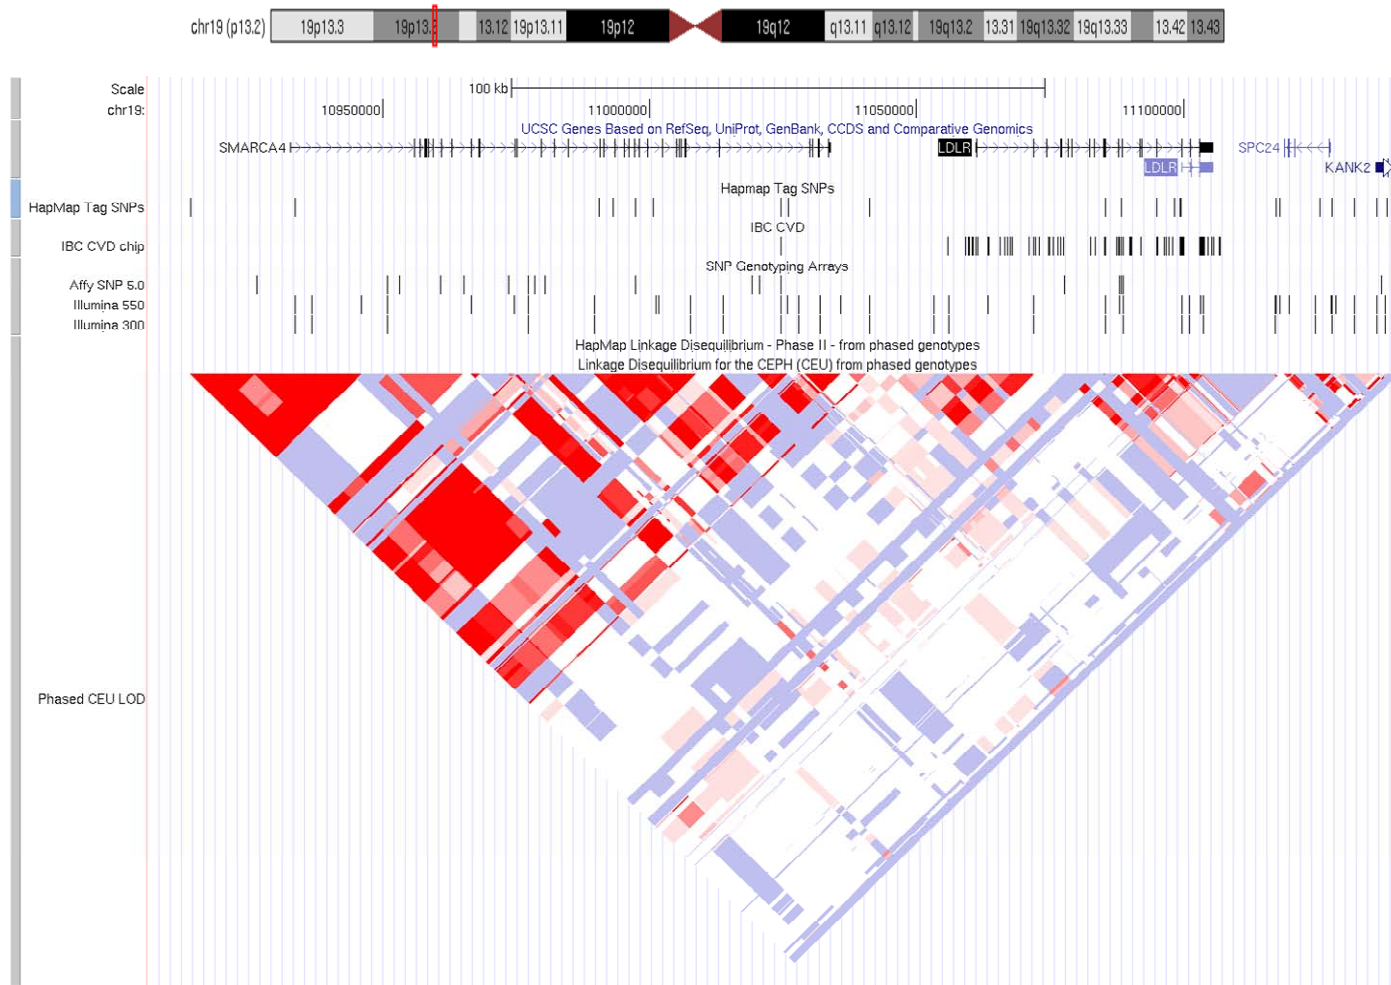

chr19:10,906,104-11,141,894

d) *BMP2* locus

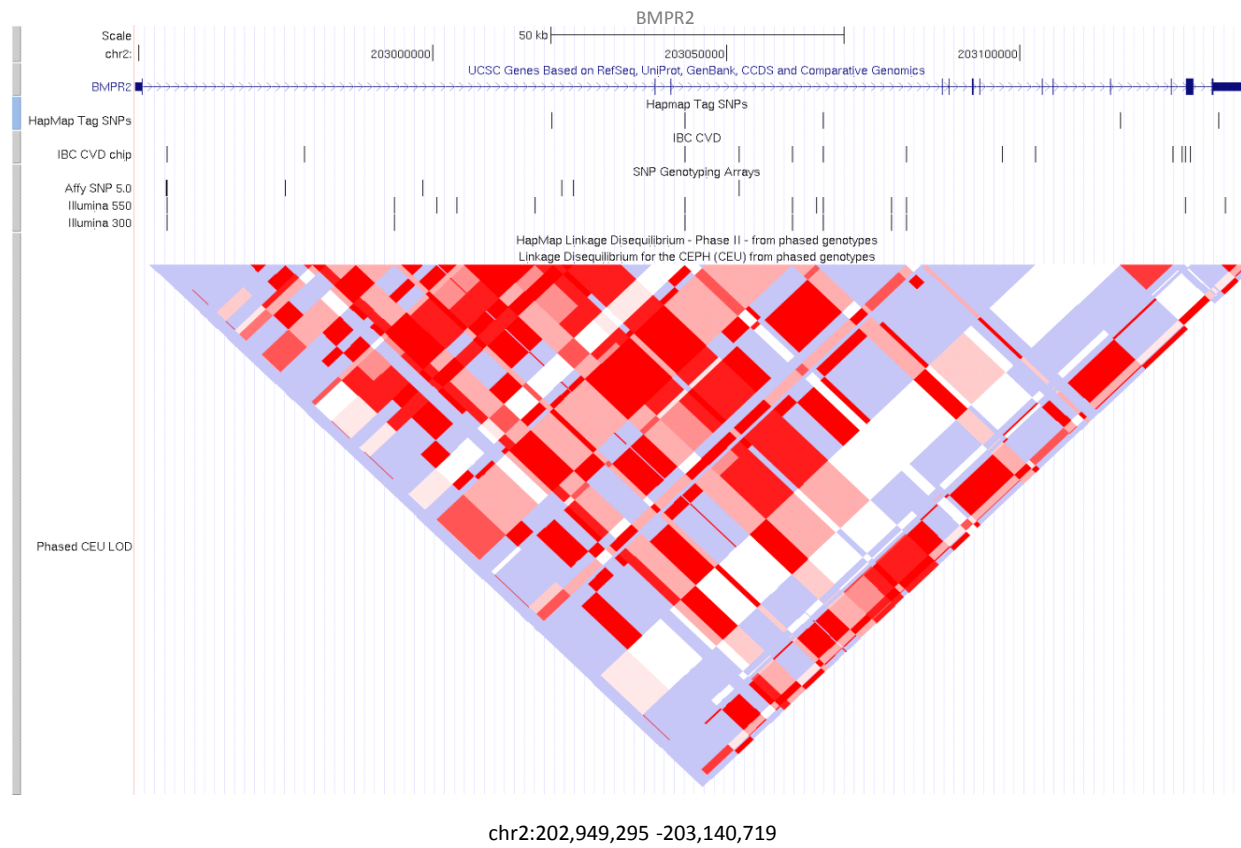

Table S1. Details of the five studies used in the meta-analyses and genotyping methodology

|                                                    | <b>Whitehall II</b> <sup>1</sup> | <b>BWHHS</b> <sup>2</sup> | <b>BRIGHT</b> <sup>3</sup> | <b>ASCOT</b> <sup>4</sup>            | <b>NORDIL</b> <sup>5</sup>           |
|----------------------------------------------------|----------------------------------|---------------------------|----------------------------|--------------------------------------|--------------------------------------|
| Design                                             | Prospective observational        | Prospective observational | Cases (from case-control)  | DNA repository from randomized trial | DNA repository from randomized trial |
| n                                                  | 5058                             | 3313                      | 1751, but see below        | 1262, but see below                  | 1935                                 |
| Males (%)                                          | 73.5                             | 0                         | 40                         | 82                                   | 50.5                                 |
| Mean age (yrs)                                     | 49                               | 69                        | 58                         | 63                                   | 56                                   |
| Proportion receiving lipid lowering medication (%) | 0.8                              | 7                         | 11.3                       | 12.6                                 | not analysed                         |
| Genotyping platform                                | IBC chip                         | IBC chip                  | IBC chip                   | IBC chip                             | IBC chip                             |
| Calling algorithm                                  | Gencall                          | Gencall                   | Illuminus                  | Illuminus                            | Illuminus                            |
| Contribution to current analysis                   | Index study                      | Meta-analysis             | Meta-analysis              | Meta-analysis                        | Meta-analysis                        |

**BRIGHT and ASCOT**

Sample sizes for BRIGHT are as follows:

without age/sex covariates: 1646 for LDL-C, and 1751 for other lipid phenotypes

with age/sex covariates: 1599 for LDL-C, and 1700 for other lipid phenotypes

Sample sizes for ASCOT are as follows:

1169 for LDL-C, 1192 for TG, and 1262 for HDLC

For both BRIGHT and ASCOT, % males, mean age and % on LLA were calculated using largest sample size (resp. 1751 and 1262)

## References

1. Marmot,M.G., Smith,G.D., Stansfeld,S., Patel,C., North,F., Head,J., White,I., Brunner,E., and Feeney,A. (1991). Health inequalities among British civil servants: the Whitehall II study. *Lancet* 337, 1387-1393
2. Lawlor,D.A., Bedford,C., Taylor,M., and Ebrahim,S. (2003). Geographical variation in cardiovascular disease, risk factors, and their control in older women: British Women's Heart and Health Study. *J. Epidemiol. Community Health* 57, 134-140
3. Caulfield,M., Munroe,P., Pembroke,J., Samani,N., Dominiczak,A., Brown,M., Benjamin,N., Webster,J., Ratcliffe,P., O'Shea,S. et al. (2003). Genome-wide mapping of human loci for essential hypertension. *Lancet* 361, 2118-2123
4. Sever,P.S., Dahlof,B., Poulter,N.R., Wedel,H., Beevers,G., Caulfield,M., Collins,R., Kjeldsen,S.E., McInnes,G.T., Mehlsen,J. et al. (2001). Rationale, design, methods and baseline demography of participants of the Anglo-Scandinavian Cardiac Outcomes Trial. ASCOT investigators. *J. Hypertens.* 19, 1139-1147
5. Hansson,L., Hedner,T., Lund-Johansen,P., Kjeldsen,S.E., Lindholm,L.H., Syvertsen,J.O., Lanke,J., de,F.U., Dahlof,B., and Karlberg,B.E. (2000). Randomised trial of effects of calcium antagonists compared with diuretics and beta-blockers on cardiovascular morbidity and mortality in hypertension: the Nordic Diltiazem (NORDIL) study. *Lancet* 356, 359-365

Table S2. SNP p Values Adjusted for Age and Gender for the 195 SNPs Associated with Lipid Traits

Excel file available online at <http://www.cell.com/AJHG>.

Table S3a. All SNPs significantly associated with LDL-C

| SNP        | CHR | BP        | GENE   | Alleles |   | MAF  | Common HMZ mean mmol/l | HTZ mean mmol/l | Rare HMZ mean mmol/l | Beta  | P-value  | R2 (univariate) | Chr R2 |
|------------|-----|-----------|--------|---------|---|------|------------------------|-----------------|----------------------|-------|----------|-----------------|--------|
|            |     |           |        | 1       | 2 |      |                        |                 |                      |       |          |                 |        |
| rs11591147 | 1   | 55278235  | PCSK9  | C       | A | 0.02 | 4.38                   | 3.84            | 2.98                 | -0.55 | 9.28E-12 | 6.98E-02        | 0.07   |
| rs4970834  | 1   | 109616403 | CELSR2 | G       | A | 0.18 | 4.42                   | 4.27            | 4.08                 | -0.16 | 5.18E-09 |                 |        |
| rs611917   | 1   | 109616775 | CELSR2 | A       | G | 0.31 | 4.44                   | 4.31            | 4.26                 | -0.11 | 1.97E-06 |                 |        |
| rs7528419  | 1   | 109618715 | CELSR2 | A       | G | 0.21 | 4.43                   | 4.27            | 4.14                 | -0.15 | 2.41E-09 |                 |        |
| rs12740374 | 1   | 109619113 | CELSR2 | C       | A | 0.21 | 4.43                   | 4.28            | 4.12                 | -0.15 | 1.82E-09 |                 |        |
| rs629301   | 1   | 109619829 | CELSR2 | A       | C | 0.21 | 4.43                   | 4.28            | 4.14                 | -0.15 | 6.50E-09 |                 |        |
| rs646776   | 1   | 109620053 | PSRC1  | A       | G | 0.21 | 4.43                   | 4.28            | 4.14                 | -0.14 | 1.03E-08 |                 |        |
| rs583104   | 1   | 109622830 | PSRC1  | A       | C | 0.22 | 4.43                   | 4.28            | 4.15                 | -0.14 | 1.15E-08 |                 |        |
| rs602633   | 1   | 109623034 | PSRC1  | C       | A | 0.20 | 4.43                   | 4.27            | 4.17                 | -0.14 | 3.15E-08 |                 |        |
| rs599839   | 1   | 109623689 | PSRC1  | A       | G | 0.22 | 4.42                   | 4.29            | 4.16                 | -0.14 | 4.31E-08 |                 |        |
| rs693      | 2   | 21085700  | APOB   | A       | G | 0.48 | 4.48                   | 4.34            | 4.27                 | -0.11 | 3.86E-08 | 7.05E-02        | 0.07   |
| rs1041968  | 2   | 21086309  | APOB   | A       | G | 0.48 | 4.48                   | 4.34            | 4.27                 | -0.11 | 5.32E-08 |                 |        |
| rs10199768 | 2   | 21097505  | APOB   | C       | A | 0.44 | 4.29                   | 4.36            | 4.49                 | 0.10  | 6.58E-07 |                 |        |
| rs531819   | 2   | 21117144  | APOB   | C       | A | 0.15 | 4.41                   | 4.26            | 4.11                 | -0.16 | 4.91E-08 |                 |        |
| rs1367117  | 2   | 21117405  | APOB   | G       | A | 0.33 | 4.30                   | 4.39            | 4.53                 | 0.12  | 2.63E-08 |                 |        |
| rs12714264 | 2   | 21119023  | APOB   | T       | A | 0.13 | 4.41                   | 4.26            | 4.09                 | -0.16 | 1.23E-07 |                 |        |
| rs1800481  | 2   | 21120715  | APOB   | G       | A | 0.15 | 4.41                   | 4.26            | 4.10                 | -0.16 | 4.95E-08 |                 |        |
| rs934197   | 2   | 21120966  | APOB   | G       | A | 0.33 | 4.30                   | 4.40            | 4.53                 | 0.12  | 3.43E-08 |                 |        |
| rs585967   | 2   | 21124059  | APOB   | C       | A | 0.15 | 4.41                   | 4.26            | 4.10                 | -0.16 | 3.28E-08 |                 |        |
| rs7575840  | 2   | 21126995  | APOB   | C       | A | 0.35 | 4.30                   | 4.38            | 4.56                 | 0.12  | 7.84E-08 |                 |        |
| rs563290   | 2   | 21141731  | APOB   | A       | G | 0.18 | 4.43                   | 4.23            | 4.20                 | -0.18 | 1.33E-11 |                 |        |
| rs562338   | 2   | 21141826  | APOB   | G       | A | 0.18 | 4.43                   | 4.24            | 4.16                 | -0.18 | 1.21E-11 |                 |        |
| rs754524   | 2   | 21165046  | APOB   | A       | C | 0.28 | 4.31                   | 4.40            | 4.57                 | 0.12  | 1.69E-07 |                 |        |
| rs754523   | 2   | 21165196  | APOB   | A       | G | 0.33 | 4.30                   | 4.37            | 4.60                 | 0.13  | 2.86E-09 |                 |        |
| rs4299376  | 2   | 43926080  | ABCG8  | A       | C | 0.32 | 4.28                   | 4.42            | 4.53                 | 0.13  | 8.70E-10 |                 |        |
| rs10038095 | 5   | 74673467  | HMGCR  | A       | T | 0.38 | 4.28                   | 4.40            | 4.51                 | 0.12  | 4.29E-08 | 5.87E-02        | 0.06   |
| rs10474434 | 5   | 74680437  | HMGCR  | C       | A | 0.23 | 4.31                   | 4.42            | 4.57                 | 0.12  | 2.05E-06 |                 |        |
| rs6453131  | 5   | 74680462  | HMGCR  | A       | C | 0.38 | 4.27                   | 4.40            | 4.50                 | 0.11  | 4.59E-08 |                 |        |
| rs17238484 | 5   | 74684252  | HMGCR  | C       | A | 0.23 | 4.31                   | 4.43            | 4.57                 | 0.12  | 1.79E-06 |                 |        |
| rs12654264 | 5   | 74684359  | HMGCR  | T       | A | 0.38 | 4.27                   | 4.40            | 4.50                 | 0.11  | 5.76E-08 |                 |        |
| rs3846662  | 5   | 74686840  | HMGCR  | A       | G | 0.43 | 4.27                   | 4.38            | 4.49                 | 0.11  | 5.17E-08 |                 |        |

|            |    |           |                 |   |   |      |      |      |      |       |          |          |      |
|------------|----|-----------|-----------------|---|---|------|------|------|------|-------|----------|----------|------|
| rs12916    | 5  | 74692295  | <i>HMGCR</i>    | A | G | 0.41 | 4.26 | 4.39 | 4.51 | 0.12  | 6.66E-09 |          |      |
| rs3804231  | 5  | 74732535  | <i>COL4A3BP</i> | G | A | 0.13 | 4.33 | 4.46 | 4.62 | 0.14  | 5.15E-06 |          |      |
| rs4704220  | 5  | 74793312  | <i>COL4A3BP</i> | G | A | 0.39 | 4.30 | 4.38 | 4.49 | 0.09  | 8.05E-06 |          |      |
| rs6589565  | 11 | 116145447 | <i>BUD13</i>    | G | A | 0.07 | 4.34 | 4.50 | 4.94 | 0.19  | 3.33E-06 | 5.63E-02 | 0.06 |
| rs2075290  | 11 | 116158506 | <i>ZNF259</i>   | A | G | 0.07 | 4.34 | 4.49 | 4.94 | 0.18  | 6.05E-06 |          |      |
| rs2266788  | 11 | 116165896 | <i>APOA5</i>    | A | G | 0.07 | 4.34 | 4.49 | 4.94 | 0.18  | 5.43E-06 |          |      |
| rs2072560  | 11 | 116167036 | <i>APOA5</i>    | G | A | 0.06 | 4.34 | 4.51 | 5.33 | 0.22  | 2.36E-07 |          |      |
| rs651821   | 11 | 116167789 | <i>APOA5</i>    | A | G | 0.06 | 4.34 | 4.50 | 5.33 | 0.21  | 6.90E-07 |          |      |
| rs662799   | 11 | 116168917 | <i>APOA4</i>    | A | G | 0.06 | 4.34 | 4.50 | 5.33 | 0.21  | 7.19E-07 |          |      |
| rs3764261  | 16 | 55550825  | <i>CETP</i>     | C | A | 0.33 | 4.43 | 4.33 | 4.23 | -0.11 | 1.06E-06 | 5.61E-02 | 0.06 |
| rs17231506 | 16 | 55552029  | <i>CETP</i>     | G | A | 0.32 | 4.44 | 4.33 | 4.22 | -0.11 | 5.02E-07 |          |      |
| rs1529729  | 19 | 11024562  | <i>SMARCA4</i>  | A | G | 0.45 | 4.28 | 4.39 | 4.44 | 0.09  | 6.71E-06 | 1.11E-01 | 0.11 |
| rs17248720 | 19 | 11059187  | <i>LDLR</i>     | G | A | 0.13 | 4.45 | 4.14 | 3.81 | -0.31 | 7.86E-25 |          |      |
| rs6511720  | 19 | 11063306  | <i>LDLR</i>     | C | A | 0.13 | 4.45 | 4.14 | 3.85 | -0.30 | 7.30E-24 |          |      |
| rs8102912  | 19 | 11066975  | <i>LDLR</i>     | G | A | 0.23 | 4.44 | 4.26 | 4.19 | -0.16 | 2.24E-11 |          |      |
| rs8110695  | 19 | 11067530  | <i>LDLR</i>     | T | A | 0.22 | 4.43 | 4.27 | 4.21 | -0.14 | 1.12E-08 |          |      |
| rs2228671  | 19 | 11071912  | <i>LDLR</i>     | G | A | 0.13 | 4.42 | 4.21 | 4.18 | -0.18 | 6.52E-10 |          |      |
| rs2569559  | 19 | 11075533  | <i>LDLR</i>     | A | C | 0.23 | 4.43 | 4.27 | 4.22 | -0.14 | 1.74E-08 |          |      |
| rs1531517  | 19 | 49934013  | <i>BCL3</i>     | G | A | 0.07 | 4.40 | 4.17 | 4.08 | -0.22 | 6.26E-08 |          |      |
| rs10402271 | 19 | 50021054  | <i>PVRL2</i>    | A | C | 0.33 | 4.26 | 4.44 | 4.53 | 0.15  | 2.06E-12 |          |      |
| rs4803763  | 19 | 50049131  | <i>PVRL2</i>    | G | C | 0.26 | 4.29 | 4.43 | 4.58 | 0.15  | 2.20E-10 |          |      |
| rs519113   | 19 | 50068124  | <i>PVRL2</i>    | C | G | 0.24 | 4.42 | 4.31 | 4.18 | -0.12 | 9.37E-07 |          |      |
| rs387976   | 19 | 50070900  | <i>PVRL2</i>    | A | C | 0.35 | 4.43 | 4.34 | 4.22 | -0.10 | 5.98E-06 |          |      |
| rs6859     | 19 | 50073874  | <i>PVRL2</i>    | G | A | 0.41 | 4.27 | 4.38 | 4.52 | 0.12  | 3.53E-08 |          |      |
| rs283813   | 19 | 50081014  | <i>PVRL2</i>    | T | A | 0.07 | 4.39 | 4.23 | 3.70 | -0.19 | 2.51E-06 |          |      |
| rs157580   | 19 | 50087106  | <i>TOMM40</i>   | A | G | 0.40 | 4.47 | 4.34 | 4.21 | -0.11 | 1.03E-07 |          |      |
| rs2075650  | 19 | 50087459  | <i>TOMM40</i>   | A | G | 0.14 | 4.31 | 4.51 | 4.87 | 0.23  | 1.14E-14 |          |      |
| rs12721046 | 19 | 50113094  | <i>APOC1</i>    | G | A | 0.15 | 4.30 | 4.51 | 4.74 | 0.21  | 7.58E-14 |          |      |
| rs12721109 | 19 | 50139061  | <i>APOC2</i>    | G | A | 0.02 | 4.39 | 3.82 | 4.32 | -0.54 | 5.06E-14 |          |      |

HMZ, homozygote ; HTZ, heterozygote

Table S3b. All SNPs significantly associated with ApoB

| SNP        | CHR | BP        | GENE          | Alleles |   | MAF  | Common HMZ mean g/l | HTZ mean g/l | Rare HMZ mean g/l | Beta  | P-value  | R2 (univariate) | Chr R2 |
|------------|-----|-----------|---------------|---------|---|------|---------------------|--------------|-------------------|-------|----------|-----------------|--------|
|            |     |           |               | 1       | 2 |      |                     |              |                   |       |          |                 |        |
| rs11591147 | 1   | 55278235  | <i>PCSK9</i>  | C       | A | 0.02 | 1.28                | 1.14         | 0.94              | -0.12 | 1.89E-10 | 7.91E-03        | 0.08   |
| rs4970834  | 1   | 109616403 | <i>CELSR2</i> | G       | A | 0.18 | 1.29                | 1.25         | 1.18              | -0.03 | 2.00E-08 | 6.00E-03        |        |
| rs611917   | 1   | 109616775 | <i>CELSR2</i> | A       | G | 0.31 | 1.29                | 1.25         | 1.23              | -0.03 | 6.69E-07 | 4.86E-03        |        |
| rs7528419  | 1   | 109618715 | <i>CELSR2</i> | A       | G | 0.21 | 1.29                | 1.25         | 1.19              | -0.03 | 8.09E-09 | 6.92E-03        |        |
| rs12740374 | 1   | 109619113 | <i>CELSR2</i> | C       | A | 0.21 | 1.29                | 1.25         | 1.19              | -0.03 | 4.70E-09 | 7.18E-03        |        |
| rs629301   | 1   | 109619829 | <i>CELSR2</i> | A       | C | 0.21 | 1.29                | 1.25         | 1.19              | -0.03 | 1.76E-08 | 6.67E-03        |        |
| rs646776   | 1   | 109620053 | <i>PSRC1</i>  | A       | G | 0.21 | 1.29                | 1.25         | 1.19              | -0.03 | 2.40E-08 | 6.55E-03        |        |
| rs583104   | 1   | 109622830 | <i>PSRC1</i>  | A       | C | 0.22 | 1.29                | 1.25         | 1.19              | -0.03 | 2.18E-08 | 6.37E-03        |        |
| rs602633   | 1   | 109623034 | <i>PSRC1</i>  | C       | A | 0.20 | 1.29                | 1.25         | 1.20              | -0.03 | 2.21E-07 | 5.64E-03        |        |
| rs599839   | 1   | 109623689 | <i>PSRC1</i>  | A       | G | 0.22 | 1.29                | 1.25         | 1.20              | -0.03 | 4.79E-08 | 5.96E-03        |        |
| rs693      | 2   | 21085700  | <i>APOB</i>   | A       | G | 0.48 | 1.29                | 1.27         | 1.25              | -0.02 | 5.69E-06 | 3.06E-03        | 0.08   |
| rs1041968  | 2   | 21086309  | <i>APOB</i>   | A       | G | 0.48 | 1.29                | 1.27         | 1.25              | -0.02 | 7.80E-06 | 2.95E-03        |        |
| rs531819   | 2   | 21117144  | <i>APOB</i>   | C       | A | 0.15 | 1.28                | 1.25         | 1.20              | -0.03 | 3.21E-07 | 4.55E-03        |        |
| rs12714264 | 2   | 21119023  | <i>APOB</i>   | T       | A | 0.13 | 1.28                | 1.24         | 1.21              | -0.04 | 1.60E-07 | 4.64E-03        |        |
| rs1800481  | 2   | 21120715  | <i>APOB</i>   | G       | A | 0.15 | 1.28                | 1.25         | 1.19              | -0.03 | 7.41E-07 | 4.36E-03        |        |
| rs585967   | 2   | 21124059  | <i>APOB</i>   | C       | A | 0.15 | 1.28                | 1.24         | 1.20              | -0.03 | 2.48E-07 | 4.63E-03        |        |
| rs563290   | 2   | 21141731  | <i>APOB</i>   | A       | G | 0.18 | 1.29                | 1.23         | 1.20              | -0.04 | 7.38E-13 | 9.29E-03        |        |
| rs562338   | 2   | 21141826  | <i>APOB</i>   | G       | A | 0.18 | 1.29                | 1.24         | 1.19              | -0.04 | 6.00E-13 | 9.24E-03        |        |
| rs754523   | 2   | 21165196  | <i>APOB</i>   | A       | G | 0.33 | 1.25                | 1.27         | 1.32              | 0.02  | 1.11E-06 | 4.15E-03        |        |
| rs4299376  | 2   | 43926080  | <i>ABCG8</i>  | A       | C | 0.32 | 1.25                | 1.28         | 1.32              | 0.03  | 7.60E-08 | 5.74E-03        |        |
| rs10038095 | 5   | 74673467  | <i>HMGCR</i>  | A       | T | 0.38 | 1.25                | 1.28         | 1.31              | 0.02  | 8.05E-06 | 3.98E-03        | 0.07   |
| rs6453131  | 5   | 74680462  | <i>HMGCR</i>  | A       | C | 0.38 | 1.25                | 1.28         | 1.31              | 0.02  | 6.34E-06 | 4.07E-03        |        |
| rs12654264 | 5   | 74684359  | <i>HMGCR</i>  | T       | A | 0.38 | 1.25                | 1.28         | 1.30              | 0.02  | 9.25E-06 | 3.90E-03        |        |
| rs3846662  | 5   | 74686840  | <i>HMGCR</i>  | A       | G | 0.43 | 1.25                | 1.27         | 1.30              | 0.02  | 8.57E-06 | 3.86E-03        |        |
| rs12916    | 5   | 74692295  | <i>HMGCR</i>  | A       | G | 0.41 | 1.25                | 1.27         | 1.31              | 0.02  | 3.34E-06 | 4.56E-03        |        |
| rs180327   | 11  | 116128869 | <i>BUD13</i>  | A       | G | 0.36 | 1.24                | 1.29         | 1.29              | 0.02  | 7.70E-07 | 5.02E-03        | 0.08   |
| rs6589565  | 11  | 116145447 | <i>BUD13</i>  | G       | A | 0.07 | 1.26                | 1.33         | 1.46              | 0.06  | 2.01E-10 | 7.59E-03        |        |
| rs2075290  | 11  | 116158506 | <i>ZNF259</i> | A       | G | 0.07 | 1.26                | 1.33         | 1.46              | 0.06  | 4.73E-10 | 7.23E-03        |        |
| rs2266788  | 11  | 116165896 | <i>APOA5</i>  | A       | G | 0.07 | 1.26                | 1.33         | 1.45              | 0.06  | 3.42E-10 | 7.34E-03        |        |

|            |    |           |                  |   |   |      |      |      |      |       |          |          |      |
|------------|----|-----------|------------------|---|---|------|------|------|------|-------|----------|----------|------|
| rs2072560  | 11 | 116167036 | <i>APOA5</i>     | G | A | 0.06 | 1.26 | 1.34 | 1.58 | 0.07  | 1.40E-12 | 9.10E-03 |      |
| rs651821   | 11 | 116167789 | <i>APOA5</i>     | A | G | 0.06 | 1.26 | 1.33 | 1.58 | 0.07  | 3.55E-12 | 8.69E-03 |      |
| rs662799   | 11 | 116168917 | <i>APOA4</i>     | A | G | 0.06 | 1.26 | 1.33 | 1.58 | 0.07  | 5.18E-12 | 8.77E-03 |      |
| rs7103224  | 11 | 116169176 | <i>APOA4</i>     | G | A | 0.08 | 1.28 | 1.22 | 1.28 | -0.04 | 7.82E-06 | 3.98E-03 |      |
| rs9804646  | 11 | 116170289 | <i>APOA4</i>     | G | A | 0.09 | 1.28 | 1.22 | 1.22 | -0.04 | 1.25E-06 | 4.49E-03 |      |
| rs11600380 | 11 | 116175392 | <i>APOA4</i>     | A | G | 0.08 | 1.28 | 1.22 | 1.26 | -0.04 | 5.19E-06 | 4.02E-03 |      |
| rs3764261  | 16 | 55550825  | <i>CETP</i>      | C | A | 0.33 | 1.29 | 1.26 | 1.23 | -0.02 | 1.52E-06 | 4.32E-03 | 0.07 |
| rs17231506 | 16 | 55552029  | <i>CETP</i>      | G | A | 0.32 | 1.29 | 1.26 | 1.23 | -0.02 | 1.36E-06 | 4.41E-03 |      |
| rs17248720 | 19 | 11059187  | <i>LDLR</i>      | G | A | 0.13 | 1.29 | 1.22 | 1.14 | -0.06 | 2.10E-15 | 1.22E-02 | 0.13 |
| rs6511720  | 19 | 11063306  | <i>LDLR</i>      | C | A | 0.13 | 1.29 | 1.22 | 1.15 | -0.05 | 6.77E-15 | 1.18E-02 |      |
| rs8102912  | 19 | 11066975  | <i>LDLR</i>      | G | A | 0.23 | 1.29 | 1.25 | 1.24 | -0.03 | 1.26E-06 | 4.01E-03 |      |
| rs2228671  | 19 | 11071912  | <i>LDLR</i>      | G | A | 0.13 | 1.28 | 1.24 | 1.23 | -0.03 | 5.00E-06 | 4.22E-03 |      |
| rs1531517  | 19 | 49934013  | <i>BCL3</i>      | G | A | 0.07 | 1.28 | 1.20 | 1.15 | -0.07 | 1.96E-13 | 1.05E-02 |      |
| rs10402271 | 19 | 50021054  | <i>PVRL2</i>     | A | C | 0.33 | 1.24 | 1.29 | 1.32 | 0.04  | 7.05E-13 | 9.93E-03 |      |
| rs4803763  | 19 | 50049131  | <i>PVRL2</i>     | G | C | 0.26 | 1.25 | 1.29 | 1.34 | 0.04  | 2.75E-12 | 9.45E-03 |      |
| rs519113   | 19 | 50068124  | <i>PVRL2</i>     | C | G | 0.24 | 1.29 | 1.25 | 1.22 | -0.03 | 2.14E-08 | 6.27E-03 |      |
| rs387976   | 19 | 50070900  | <i>PVRL2</i>     | A | C | 0.35 | 1.29 | 1.26 | 1.22 | -0.03 | 1.54E-07 | 5.86E-03 |      |
| rs6859     | 19 | 50073874  | <i>PVRL2</i>     | G | A | 0.41 | 1.24 | 1.28 | 1.32 | 0.03  | 1.49E-10 | 9.21E-03 |      |
| rs283813   | 19 | 50081014  | <i>PVRL2</i>     | T | A | 0.07 | 1.28 | 1.23 | 1.09 | -0.05 | 2.61E-08 | 5.41E-03 |      |
| rs157580   | 19 | 50087106  | <i>TOMM40</i>    | A | G | 0.40 | 1.30 | 1.26 | 1.23 | -0.02 | 6.55E-07 | 6.92E-03 |      |
| rs2075650  | 19 | 50087459  | <i>TOMM40</i>    | A | G | 0.14 | 1.25 | 1.31 | 1.45 | 0.06  | 8.38E-18 | 1.50E-02 |      |
| rs405509   | 19 | 50100676  | <i>APOE;PKP2</i> | C | A | 0.48 | 1.25 | 1.27 | 1.30 | 0.03  | 1.89E-08 | 5.06E-03 |      |
| rs12721046 | 19 | 50113094  | <i>APOC1</i>     | G | A | 0.15 | 1.25 | 1.32 | 1.41 | 0.06  | 1.01E-17 | 1.55E-02 |      |
| rs12721109 | 19 | 50139061  | <i>APOC2</i>     | G | A | 0.02 | 1.28 | 1.10 | 1.05 | -0.15 | 3.88E-19 | 1.67E-02 |      |

HMZ, homozygote ; HTZ, heterozygote



Table S3c. All SNPs significantly associated with Triglycerides

| SNP        | CHR | BP       | GENE           | Alleles |   | MAF  | Common HMZ mean mmol/l | HTZ mean mmol/l | Rare HMZ mean mmol/l | Beta  | P-value  | R2 (univariate) | Chr R2 |
|------------|-----|----------|----------------|---------|---|------|------------------------|-----------------|----------------------|-------|----------|-----------------|--------|
|            |     |          |                | 1       | 2 |      |                        |                 |                      |       |          |                 |        |
| rs1260326  | 2   | 27584444 | <i>GCKR</i>    | G       | A | 0.40 | 1.38                   | 1.43            | 1.63                 | 0.06  | 1.83E-07 | 5.67E-03        | 0.06   |
| rs714052   | 7   | 72502805 | <i>BAZ1B</i>   | A       | G | 0.12 | 1.48                   | 1.33            | 1.29                 | -0.09 | 4.38E-07 | 4.88E-03        | 0.07   |
| rs2074755  | 7   | 72515102 | <i>BAZ1B</i>   | A       | G | 0.12 | 1.48                   | 1.33            | 1.29                 | -0.09 | 2.94E-07 | 4.97E-03        |        |
| rs17145713 | 7   | 72542746 | <i>BAZ1B</i>   | G       | A | 0.20 | 1.50                   | 1.36            | 1.25                 | -0.09 | 5.29E-10 | 7.11E-03        |        |
| rs12539316 | 7   | 72615834 | <i>TBL2</i>    | A       | G | 0.29 | 1.49                   | 1.41            | 1.33                 | -0.05 | 9.39E-06 | 3.78E-03        |        |
| rs2286276  | 7   | 72625290 | <i>TBL2</i>    | G       | A | 0.29 | 1.49                   | 1.41            | 1.33                 | -0.05 | 9.48E-06 | 3.73E-03        |        |
| rs11974409 | 7   | 72627326 | <i>TBL2</i>    | A       | G | 0.20 | 1.49                   | 1.36            | 1.27                 | -0.08 | 5.66E-09 | 6.03E-03        |        |
| rs1051921  | 7   | 72645879 | <i>MLXIPL</i>  | G       | A | 0.20 | 1.49                   | 1.36            | 1.28                 | -0.08 | 1.25E-08 | 5.60E-03        |        |
| rs17145750 | 7   | 72664314 | <i>MLXIPL</i>  | G       | A | 0.16 | 1.48                   | 1.35            | 1.29                 | -0.07 | 1.48E-06 | 4.15E-03        |        |
| rs7800944  | 7   | 72673793 | <i>MLXIPL</i>  | A       | G | 0.29 | 1.49                   | 1.41            | 1.33                 | -0.05 | 8.59E-06 | 3.79E-03        |        |
| rs253      | 8   | 19855697 | <i>LPL</i>     | G       | A | 0.45 | 1.53                   | 1.44            | 1.34                 | -0.05 | 6.48E-06 | 4.68E-03        | 0.08   |
| rs255      | 8   | 19856181 | <i>LPL</i>     | A       | G | 0.15 | 1.48                   | 1.36            | 1.23                 | -0.07 | 2.46E-06 | 4.14E-03        |        |
| rs256      | 8   | 19856247 | <i>LPL</i>     | G       | A | 0.15 | 1.48                   | 1.37            | 1.15                 | -0.07 | 2.07E-06 | 4.27E-03        |        |
| rs258      | 8   | 19856532 | <i>LPL</i>     | C       | G | 0.45 | 1.52                   | 1.44            | 1.33                 | -0.05 | 8.69E-06 | 4.53E-03        |        |
| rs263      | 8   | 19857092 | <i>LPL</i>     | G       | A | 0.18 | 1.48                   | 1.40            | 1.12                 | -0.07 | 3.09E-06 | 4.25E-03        |        |
| rs264      | 8   | 19857460 | <i>LPL</i>     | G       | A | 0.15 | 1.48                   | 1.37            | 1.17                 | -0.07 | 2.51E-06 | 4.16E-03        |        |
| rs271      | 8   | 19857982 | <i>LPL</i>     | G       | A | 0.15 | 1.48                   | 1.36            | 1.25                 | -0.08 | 6.59E-07 | 4.59E-03        |        |
| rs285      | 8   | 19859469 | <i>LPL</i>     | G       | A | 0.47 | 1.54                   | 1.45            | 1.31                 | -0.07 | 2.65E-09 | 7.73E-03        |        |
| rs301      | 8   | 19861214 | <i>LPL</i>     | A       | G | 0.25 | 1.51                   | 1.38            | 1.21                 | -0.08 | 2.17E-11 | 8.38E-03        |        |
| rs320      | 8   | 19863357 | <i>LPL</i>     | A       | C | 0.28 | 1.51                   | 1.40            | 1.26                 | -0.08 | 1.79E-10 | 7.33E-03        |        |
| rs327      | 8   | 19863816 | <i>LPL</i>     | A       | C | 0.29 | 1.51                   | 1.40            | 1.25                 | -0.08 | 2.40E-10 | 7.40E-03        |        |
| rs328      | 8   | 19864004 | <i>LPL</i>     | C       | G | 0.11 | 1.48                   | 1.31            | 1.07                 | -0.11 | 8.42E-10 | 7.26E-03        |        |
| rs331      | 8   | 19864685 | <i>LPL</i>     | G       | A | 0.27 | 1.51                   | 1.39            | 1.24                 | -0.08 | 1.73E-11 | 8.13E-03        |        |
| rs12679834 | 8   | 19864713 | <i>LPL</i>     | A       | G | 0.11 | 1.48                   | 1.31            | 1.07                 | -0.11 | 1.06E-09 | 7.30E-03        |        |
| rs3289     | 8   | 19867472 | <i>LPL</i>     | A       | G | 0.03 | 1.43                   | 1.70            | 1.04                 | 0.16  | 3.16E-06 | 3.79E-03        |        |
| rs3208305  | 8   | 19867928 | <i>LPL</i>     | A       | T | 0.30 | 1.52                   | 1.40            | 1.24                 | -0.08 | 3.06E-11 | 8.09E-03        |        |
| rs3735964  | 8   | 19868325 | <i>LPL</i>     | C       | A | 0.12 | 1.48                   | 1.31            | 1.17                 | -0.10 | 9.09E-09 | 6.18E-03        |        |
| rs13702    | 8   | 19868772 | <i>LPL</i>     | A       | G | 0.30 | 1.52                   | 1.40            | 1.24                 | -0.08 | 2.85E-11 | 8.21E-03        |        |
| rs3916027  | 8   | 19869148 | <i>SLC18A1</i> | G       | A | 0.27 | 1.51                   | 1.40            | 1.24                 | -0.08 | 1.04E-10 | 7.43E-03        |        |

|            |    |           |                |   |   |      |      |      |      |       |          |          |      |
|------------|----|-----------|----------------|---|---|------|------|------|------|-------|----------|----------|------|
| rs2197089  | 8  | 19870653  | <i>SLC18A1</i> | A | G | 0.45 | 1.35 | 1.45 | 1.57 | 0.06  | 5.03E-09 | 7.37E-03 |      |
| rs17482753 | 8  | 19876926  | <i>SLC18A1</i> | C | A | 0.11 | 1.48 | 1.31 | 1.07 | -0.11 | 3.20E-09 | 6.76E-03 |      |
| rs10503669 | 8  | 19891970  | <i>SLC18A1</i> | C | A | 0.11 | 1.48 | 1.30 | 1.08 | -0.11 | 1.05E-09 | 7.28E-03 |      |
| rs17410962 | 8  | 19892360  | <i>SLC18A1</i> | G | A | 0.13 | 1.49 | 1.31 | 1.13 | -0.10 | 4.64E-09 | 7.01E-03 |      |
| rs17489268 | 8  | 19896325  | <i>SLC18A1</i> | A | T | 0.27 | 1.51 | 1.40 | 1.24 | -0.08 | 1.78E-10 | 7.48E-03 |      |
| rs17411031 | 8  | 19896590  | <i>SLC18A1</i> | C | G | 0.27 | 1.51 | 1.40 | 1.24 | -0.08 | 2.90E-10 | 7.27E-03 |      |
| rs17489282 | 8  | 19896798  | <i>SLC18A1</i> | G | A | 0.27 | 1.51 | 1.40 | 1.24 | -0.08 | 2.13E-10 | 7.33E-03 |      |
| rs17411126 | 8  | 19899552  | <i>SLC18A1</i> | A | G | 0.27 | 1.51 | 1.40 | 1.24 | -0.08 | 1.74E-10 | 7.27E-03 |      |
| rs765547   | 8  | 19910554  | <i>SLC18A1</i> | G | A | 0.27 | 1.51 | 1.40 | 1.24 | -0.08 | 2.02E-10 | 7.20E-03 |      |
| rs11986942 | 8  | 19911725  | <i>SLC18A1</i> | G | C | 0.31 | 1.51 | 1.41 | 1.28 | -0.06 | 4.79E-08 | 5.47E-03 |      |
| rs1919484  | 8  | 19913956  | <i>SLC18A1</i> | G | A | 0.27 | 1.51 | 1.40 | 1.24 | -0.08 | 1.46E-10 | 7.33E-03 |      |
| rs6586891  | 8  | 19958878  | <i>SLC18A1</i> | A | C | 0.34 | 1.41 | 1.45 | 1.56 | 0.05  | 4.17E-06 | 3.54E-03 |      |
| rs2001844  | 8  | 126547927 | <i>TRIB1</i>   | A | G | 0.47 | 1.52 | 1.43 | 1.38 | -0.05 | 8.89E-06 | 3.86E-03 |      |
| rs17321515 | 8  | 126555591 | <i>TRIB1</i>   | A | G | 0.47 | 1.53 | 1.43 | 1.37 | -0.05 | 3.47E-06 | 4.25E-03 |      |
| rs2980869  | 8  | 126557432 | <i>TRIB1</i>   | G | A | 0.47 | 1.53 | 1.43 | 1.38 | -0.05 | 6.88E-06 | 3.86E-03 |      |
| rs17108993 | 10 | 95354023  | <i>RBP4</i>    | C | G | 0.03 | 1.42 | 1.72 | 1.53 | 0.14  | 8.04E-06 | 4.22E-03 | 0.06 |
| rs499790   | 11 | 116024949 | <i>BUD13</i>   | G | A | 0.10 | 1.41 | 1.55 | 2.06 | 0.09  | 3.24E-07 | 5.34E-03 | 0.09 |
| rs480823   | 11 | 116030940 | <i>BUD13</i>   | A | G | 0.08 | 1.41 | 1.59 | 2.29 | 0.11  | 1.07E-08 | 6.75E-03 |      |
| rs481843   | 11 | 116031077 | <i>BUD13</i>   | G | A | 0.08 | 1.41 | 1.59 | 2.32 | 0.11  | 1.48E-08 | 6.57E-03 |      |
| rs4938303  | 11 | 116090197 | <i>BUD13</i>   | A | G | 0.27 | 1.39 | 1.49 | 1.59 | 0.06  | 3.47E-06 | 4.64E-03 |      |
| rs28927680 | 11 | 116124283 | <i>BUD13</i>   | C | G | 0.07 | 1.42 | 1.62 | 1.90 | 0.13  | 4.24E-09 | 7.63E-03 |      |
| rs180327   | 11 | 116128869 | <i>BUD13</i>   | A | G | 0.36 | 1.31 | 1.52 | 1.57 | 0.08  | 3.09E-12 | 1.02E-02 |      |
| rs11820589 | 11 | 116139072 | <i>BUD13</i>   | G | A | 0.06 | 1.42 | 1.62 | 1.99 | 0.13  | 2.58E-09 | 7.80E-03 |      |
| rs6589565  | 11 | 116145447 | <i>BUD13</i>   | G | A | 0.07 | 1.39 | 1.81 | 1.92 | 0.19  | 4.49E-20 | 1.63E-02 |      |
| rs12286037 | 11 | 116157417 | <i>ZNF259</i>  | G | A | 0.06 | 1.42 | 1.64 | 1.83 | 0.13  | 1.55E-09 | 7.96E-03 |      |
| rs2075290  | 11 | 116158506 | <i>ZNF259</i>  | A | G | 0.07 | 1.39 | 1.80 | 1.92 | 0.19  | 6.55E-20 | 1.60E-02 |      |
| rs603446   | 11 | 116159645 | <i>ZNF259</i>  | G | A | 0.45 | 1.52 | 1.45 | 1.31 | -0.05 | 8.78E-06 | 4.26E-03 |      |
| rs12285095 | 11 | 116163241 | <i>ZNF259</i>  | A | C | 0.06 | 1.42 | 1.63 | 1.85 | 0.13  | 7.29E-09 | 7.18E-03 |      |
| rs2266788  | 11 | 116165896 | <i>APOA5</i>   | A | G | 0.07 | 1.39 | 1.81 | 1.88 | 0.19  | 1.16E-19 | 1.59E-02 |      |
| rs2072560  | 11 | 116167036 | <i>APOA5</i>   | G | A | 0.06 | 1.39 | 1.81 | 2.04 | 0.21  | 1.92E-20 | 1.62E-02 |      |
| rs12287066 | 11 | 116167541 | <i>APOA5</i>   | C | A | 0.06 | 1.42 | 1.64 | 1.85 | 0.13  | 3.13E-09 | 7.70E-03 |      |
| rs651821   | 11 | 116167789 | <i>APOA5</i>   | A | G | 0.06 | 1.39 | 1.81 | 2.04 | 0.21  | 8.89E-21 | 1.64E-02 |      |
| rs662799   | 11 | 116168917 | <i>APOA4</i>   | A | G | 0.06 | 1.39 | 1.81 | 2.04 | 0.21  | 2.91E-20 | 1.62E-02 |      |
| rs10750097 | 11 | 116169250 | <i>APOA4</i>   | A | G | 0.21 | 1.38 | 1.53 | 1.70 | 0.09  | 1.26E-10 | 8.11E-03 |      |
| rs7396835  | 11 | 116189238 | <i>APOA4</i>   | G | A | 0.13 | 1.40 | 1.56 | 1.79 | 0.09  | 1.38E-08 | 6.27E-03 |      |

|            |    |           |                   |   |   |      |      |      |      |       |          |          |      |
|------------|----|-----------|-------------------|---|---|------|------|------|------|-------|----------|----------|------|
| rs7396851  | 11 | 116189374 | <i>APOA4</i>      | G | A | 0.13 | 1.40 | 1.56 | 1.80 | 0.09  | 4.66E-09 | 6.67E-03 |      |
| rs33989105 | 11 | 116205352 | <i>APOC3</i>      | G | A | 0.25 | 1.40 | 1.47 | 1.67 | 0.07  | 1.75E-07 | 5.44E-03 |      |
| rs5142     | 11 | 116207060 | <i>APOA1</i>      | G | A | 0.09 | 1.41 | 1.61 | 1.88 | 0.11  | 1.26E-08 | 6.14E-03 |      |
| rs5072     | 11 | 116212793 | <i>APOA1;NCAN</i> | G | A | 0.08 | 1.41 | 1.60 | 1.84 | 0.11  | 1.74E-07 | 5.50E-03 |      |
| rs3794991  | 19 | 19471596  | <i>PBX4</i>       | G | A | 0.09 | 1.47 | 1.32 | 1.08 | -0.09 | 4.41E-06 | 4.37E-03 | 0.06 |
| rs16996148 | 19 | 19519472  | <i>PBX4</i>       | C | A | 0.08 | 1.47 | 1.31 | 1.09 | -0.09 | 1.69E-06 | 4.76E-03 |      |
| rs12610185 | 19 | 19582722  | <i>PBX4</i>       | G | A | 0.09 | 1.47 | 1.31 | 1.09 | -0.10 | 5.64E-07 | 5.22E-03 |      |
| rs10500212 | 19 | 19584215  | <i>GMIP</i>       | G | A | 0.09 | 1.47 | 1.31 | 1.09 | -0.10 | 6.79E-07 | 5.12E-03 |      |
| rs2304128  | 19 | 19607151  | <i>GMIP</i>       | C | A | 0.09 | 1.47 | 1.31 | 0.99 | -0.10 | 3.15E-07 | 5.29E-03 |      |

HMZ, homozygote ; HTZ, heterozygote

Table S3d. All SNPs significantly associated with HDL-C

| SNP        | CHR | BP        | GENE    | Alleles |   | MAF  | Common HMZ mean mmol/l | HTZ mean mmol/l | Rare HMZ mean mmol/l | Beta  | P-value  | R2 (univariate) | Chr R2 |
|------------|-----|-----------|---------|---------|---|------|------------------------|-----------------|----------------------|-------|----------|-----------------|--------|
|            |     |           |         | 1       | 2 |      |                        |                 |                      |       |          |                 |        |
| rs285      | 8   | 19859469  | LPL     | G       | A | 0.47 | 1.41                   | 1.42            | 1.49                 | 0.03  | 1.61E-06 | 4.94E-03        | 0.17   |
| rs301      | 8   | 19861214  | LPL     | A       | G | 0.25 | 1.41                   | 1.46            | 1.52                 | 0.04  | 9.25E-11 | 6.87E-03        |        |
| rs320      | 8   | 19863357  | LPL     | A       | C | 0.28 | 1.41                   | 1.45            | 1.50                 | 0.03  | 3.61E-09 | 5.21E-03        |        |
| rs327      | 8   | 19863816  | LPL     | A       | C | 0.29 | 1.41                   | 1.45            | 1.50                 | 0.03  | 6.71E-09 | 5.22E-03        |        |
| rs328      | 8   | 19864004  | LPL     | C       | G | 0.11 | 1.42                   | 1.49            | 1.51                 | 0.05  | 3.17E-08 | 5.53E-03        |        |
| rs331      | 8   | 19864685  | LPL     | G       | A | 0.27 | 1.41                   | 1.45            | 1.50                 | 0.04  | 2.83E-10 | 5.89E-03        |        |
| rs12679834 | 8   | 19864713  | LPL     | A       | G | 0.11 | 1.42                   | 1.49            | 1.51                 | 0.05  | 5.39E-08 | 5.51E-03        |        |
| rs3208305  | 8   | 19867928  | LPL     | A       | T | 0.30 | 1.41                   | 1.45            | 1.51                 | 0.04  | 5.35E-10 | 5.87E-03        |        |
| rs3735964  | 8   | 19868325  | LPL     | C       | A | 0.12 | 1.42                   | 1.49            | 1.47                 | 0.04  | 1.17E-07 | 4.80E-03        |        |
| rs13702    | 8   | 19868772  | LPL     | A       | G | 0.30 | 1.41                   | 1.45            | 1.51                 | 0.04  | 7.49E-10 | 5.87E-03        |        |
| rs3916027  | 8   | 19869148  | SLC18A1 | G       | A | 0.27 | 1.41                   | 1.45            | 1.51                 | 0.04  | 5.39E-10 | 5.64E-03        |        |
| rs2197089  | 8   | 19870653  | SLC18A1 | A       | G | 0.45 | 1.48                   | 1.41            | 1.41                 | -0.03 | 2.68E-06 | 4.58E-03        |        |
| rs17482753 | 8   | 19876926  | SLC18A1 | C       | A | 0.11 | 1.42                   | 1.49            | 1.51                 | 0.05  | 5.31E-08 | 5.38E-03        |        |
| rs10503669 | 8   | 19891970  | SLC18A1 | C       | A | 0.11 | 1.42                   | 1.49            | 1.51                 | 0.05  | 6.00E-08 | 5.42E-03        |        |
| rs17410962 | 8   | 19892360  | SLC18A1 | G       | A | 0.13 | 1.42                   | 1.48            | 1.52                 | 0.04  | 1.31E-07 | 5.52E-03        |        |
| rs17489268 | 8   | 19896325  | SLC18A1 | A       | T | 0.27 | 1.41                   | 1.45            | 1.51                 | 0.04  | 1.19E-09 | 5.73E-03        |        |
| rs17411031 | 8   | 19896590  | SLC18A1 | C       | G | 0.27 | 1.41                   | 1.45            | 1.51                 | 0.04  | 1.09E-09 | 5.80E-03        |        |
| rs17489282 | 8   | 19896798  | SLC18A1 | G       | A | 0.27 | 1.41                   | 1.45            | 1.51                 | 0.04  | 7.54E-10 | 5.75E-03        |        |
| rs17411126 | 8   | 19899552  | SLC18A1 | A       | G | 0.27 | 1.41                   | 1.45            | 1.51                 | 0.04  | 7.77E-10 | 5.65E-03        |        |
| rs765547   | 8   | 19910554  | SLC18A1 | G       | A | 0.27 | 1.41                   | 1.45            | 1.51                 | 0.04  | 5.55E-10 | 5.69E-03        |        |
| rs11986942 | 8   | 19911725  | SLC18A1 | G       | C | 0.31 | 1.41                   | 1.45            | 1.49                 | 0.03  | 4.01E-08 | 4.44E-03        |        |
| rs1919484  | 8   | 19913956  | SLC18A1 | G       | A | 0.27 | 1.41                   | 1.45            | 1.51                 | 0.04  | 9.68E-10 | 5.59E-03        |        |
| rs180327   | 11  | 116128869 | BUD13   | A       | G | 0.36 | 1.45                   | 1.43            | 1.38                 | -0.03 | 3.81E-06 | 4.31E-03        | 0.17   |
| rs11820589 | 11  | 116139072 | BUD13   | G       | A | 0.06 | 1.44                   | 1.39            | 1.14                 | -0.05 | 7.66E-06 | 4.19E-03        |        |
| rs6589565  | 11  | 116145447 | BUD13   | G       | A | 0.07 | 1.44                   | 1.37            | 1.40                 | -0.05 | 4.40E-07 | 4.25E-03        |        |
| rs2075290  | 11  | 116158506 | ZNF259  | A       | G | 0.07 | 1.44                   | 1.37            | 1.40                 | -0.05 | 4.24E-07 | 4.11E-03        |        |
| rs2266788  | 11  | 116165896 | APOA5   | A       | G | 0.07 | 1.44                   | 1.37            | 1.41                 | -0.05 | 4.82E-07 | 4.19E-03        |        |
| rs2072560  | 11  | 116167036 | APOA5   | G       | A | 0.06 | 1.44                   | 1.37            | 1.28                 | -0.06 | 7.39E-08 | 4.63E-03        |        |
| rs651821   | 11  | 116167789 | APOA5   | A       | G | 0.06 | 1.44                   | 1.38            | 1.28                 | -0.06 | 1.03E-07 | 4.36E-03        |        |

|            |    |           |       |   |   |      |      |      |      |       |          |          |      |
|------------|----|-----------|-------|---|---|------|------|------|------|-------|----------|----------|------|
| rs662799   | 11 | 116168917 | APOA4 | A | G | 0.06 | 1.44 | 1.37 | 1.28 | -0.06 | 6.52E-08 | 4.70E-03 |      |
| rs10750097 | 11 | 116169250 | APOA4 | A | G | 0.21 | 1.45 | 1.41 | 1.37 | -0.03 | 1.33E-07 | 4.41E-03 |      |
| rs4775041  | 15 | 56461987  | LIPC  | C | G | 0.30 | 1.41 | 1.43 | 1.53 | 0.03  | 2.05E-07 | 4.51E-03 | 0.18 |
| rs1800588  | 15 | 56510967  | LIPC  | G | A | 0.21 | 1.41 | 1.45 | 1.54 | 0.03  | 3.85E-07 | 4.87E-03 |      |
| rs2070895  | 15 | 56511231  | LIPC  | G | A | 0.22 | 1.41 | 1.45 | 1.54 | 0.03  | 2.38E-07 | 5.08E-03 |      |
| rs261332   | 15 | 56514617  | LIPC  | G | A | 0.21 | 1.41 | 1.45 | 1.55 | 0.03  | 1.92E-07 | 5.14E-03 |      |
| rs588136   | 15 | 56517790  | LIPC  | A | G | 0.21 | 1.41 | 1.46 | 1.53 | 0.03  | 7.02E-07 | 4.94E-03 |      |
| rs261342   | 15 | 56518445  | LIPC  | C | G | 0.22 | 1.41 | 1.45 | 1.54 | 0.03  | 6.28E-08 | 5.48E-03 |      |
| rs9989419  | 16 | 55542640  | CETP  | G | A | 0.40 | 1.49 | 1.42 | 1.34 | -0.05 | 9.76E-21 | 1.58E-02 | 0.21 |
| rs12708967 | 16 | 55550712  | CETP  | A | G | 0.19 | 1.47 | 1.38 | 1.29 | -0.06 | 8.79E-23 | 1.71E-02 |      |
| rs3764261  | 16 | 55550825  | CETP  | C | A | 0.33 | 1.37 | 1.47 | 1.56 | 0.07  | 6.80E-36 | 2.60E-02 |      |
| rs12720918 | 16 | 55551713  | CETP  | A | G | 0.28 | 1.47 | 1.40 | 1.37 | -0.05 | 1.00E-15 | 1.03E-02 |      |
| rs17231506 | 16 | 55552029  | CETP  | G | A | 0.32 | 1.37 | 1.47 | 1.56 | 0.07  | 2.21E-36 | 2.62E-02 |      |
| rs1800775  | 16 | 55552737  | CETP  | C | A | 0.49 | 1.35 | 1.44 | 1.52 | 0.06  | 2.63E-29 | 2.21E-02 |      |
| rs711752   | 16 | 55553712  | CETP  | G | A | 0.43 | 1.35 | 1.45 | 1.52 | 0.06  | 6.48E-32 | 2.36E-02 |      |
| rs708272   | 16 | 55553789  | CETP  | G | A | 0.43 | 1.35 | 1.45 | 1.52 | 0.06  | 1.87E-32 | 2.41E-02 |      |
| rs1864163  | 16 | 55554734  | CETP  | G | A | 0.26 | 1.48 | 1.38 | 1.32 | -0.06 | 2.80E-27 | 2.07E-02 |      |
| rs7203984  | 16 | 55556759  | CETP  | A | C | 0.19 | 1.47 | 1.37 | 1.31 | -0.06 | 1.08E-20 | 1.51E-02 |      |
| rs11508026 | 16 | 55556829  | CETP  | G | A | 0.43 | 1.35 | 1.45 | 1.52 | 0.06  | 9.92E-30 | 2.15E-02 |      |
| rs708273   | 16 | 55557450  | CETP  | G | A | 0.30 | 1.46 | 1.41 | 1.37 | -0.03 | 1.00E-06 | 4.51E-03 |      |
| rs12720922 | 16 | 55558386  | CETP  | G | A | 0.18 | 1.47 | 1.37 | 1.30 | -0.06 | 1.34E-21 | 1.60E-02 |      |
| rs12597002 | 16 | 55559905  | CETP  | C | A | 0.30 | 1.46 | 1.41 | 1.37 | -0.03 | 1.31E-06 | 4.40E-03 |      |
| rs9939224  | 16 | 55560233  | CETP  | C | A | 0.20 | 1.47 | 1.38 | 1.30 | -0.06 | 5.81E-23 | 1.71E-02 |      |
| rs1532625  | 16 | 55562802  | CETP  | G | A | 0.44 | 1.35 | 1.45 | 1.52 | 0.06  | 2.91E-31 | 2.25E-02 |      |
| rs1532624  | 16 | 55562980  | CETP  | C | A | 0.44 | 1.35 | 1.45 | 1.52 | 0.06  | 4.96E-31 | 2.23E-02 |      |
| rs11076175 | 16 | 55563879  | CETP  | A | G | 0.17 | 1.47 | 1.37 | 1.29 | -0.07 | 5.58E-23 | 1.76E-02 |      |
| rs7499892  | 16 | 55564091  | CETP  | G | A | 0.17 | 1.47 | 1.36 | 1.30 | -0.07 | 7.14E-24 | 1.83E-02 |      |
| rs5883     | 16 | 55564854  | CETP  | G | A | 0.06 | 1.42 | 1.51 | 1.54 | 0.05  | 5.92E-06 | 4.31E-03 |      |
| rs11076176 | 16 | 55564947  | CETP  | A | C | 0.16 | 1.45 | 1.39 | 1.31 | -0.05 | 4.62E-12 | 8.18E-03 |      |
| rs289714   | 16 | 55564952  | CETP  | A | G | 0.17 | 1.45 | 1.39 | 1.35 | -0.04 | 2.56E-10 | 6.91E-03 |      |
| rs289716   | 16 | 55566877  | CETP  | A | T | 0.31 | 1.40 | 1.45 | 1.51 | 0.03  | 1.22E-09 | 7.35E-03 |      |
| rs289717   | 16 | 55566889  | CETP  | G | A | 0.35 | 1.46 | 1.42 | 1.36 | -0.03 | 6.89E-10 | 6.54E-03 |      |
| rs289718   | 16 | 55567433  | CETP  | A | G | 0.32 | 1.40 | 1.44 | 1.52 | 0.04  | 2.55E-10 | 8.36E-03 |      |
| rs289719   | 16 | 55567442  | CETP  | G | A | 0.31 | 1.40 | 1.44 | 1.51 | 0.03  | 1.27E-09 | 7.19E-03 |      |
| rs4784744  | 16 | 55568686  | CETP  | G | A | 0.35 | 1.46 | 1.42 | 1.36 | -0.03 | 5.37E-10 | 6.40E-03 |      |

|            |    |          |              |   |   |      |      |      |      |       |          |          |  |
|------------|----|----------|--------------|---|---|------|------|------|------|-------|----------|----------|--|
| rs291044   | 16 | 55568953 | <i>CETP</i>  | G | A | 0.35 | 1.46 | 1.42 | 1.36 | -0.03 | 9.67E-10 | 6.23E-03 |  |
| rs12720889 | 16 | 55570064 | <i>CETP</i>  | T | A | 0.30 | 1.40 | 1.45 | 1.51 | 0.03  | 1.33E-09 | 7.23E-03 |  |
| rs4784745  | 16 | 55572376 | <i>CETP</i>  | A | G | 0.35 | 1.46 | 1.43 | 1.36 | -0.03 | 5.13E-09 | 5.75E-03 |  |
| rs5880     | 16 | 55572592 | <i>CETP</i>  | G | C | 0.05 | 1.44 | 1.34 | 1.20 | -0.08 | 6.90E-12 | 7.02E-03 |  |
| rs5882     | 16 | 55573593 | <i>CETP</i>  | A | G | 0.32 | 1.41 | 1.44 | 1.50 | 0.03  | 2.78E-07 | 4.91E-03 |  |
| rs1800777  | 16 | 55574820 | <i>CETP</i>  | G | A | 0.04 | 1.44 | 1.33 | 1.23 | -0.09 | 8.46E-11 | 6.19E-03 |  |
| rs289743   | 16 | 55575297 | <i>NLRC5</i> | A | G | 0.31 | 1.41 | 1.44 | 1.51 | 0.03  | 8.62E-09 | 6.38E-03 |  |

HMZ, homozygote ; HTZ, heterozygote

Table S3e. All SNPs significantly associated with ApoA1

| SNP        | CHR | BP        | GENE  | Alleles |   | MAF  | Common<br>HMZ<br><br>mean<br><br>g/l | HTZ<br><br>mean<br><br>g/l | Rare<br>HMZ<br><br>mean<br><br>g/l | Beta  | P-value  | R2<br><br>(univariate) | Chr R2 |
|------------|-----|-----------|-------|---------|---|------|--------------------------------------|----------------------------|------------------------------------|-------|----------|------------------------|--------|
|            |     |           |       | 1       | 2 |      |                                      |                            |                                    |       |          |                        |        |
| rs301      | 8   | 19861214  | LPL   | A       | G | 0.25 | 2.12                                 | 2.15                       | 2.21                               | 0.04  | 4.16E-06 | 3.60E-03               | 0.14   |
| rs1883025  | 9   | 106704122 | ABCA1 | G       | A | 0.26 | 2.16                                 | 2.12                       | 2.09                               | -0.04 | 4.81E-06 | 4.29E-03               | 0.14   |
| rs4775041  | 15  | 56461987  | LIPC  | C       | G | 0.30 | 2.12                                 | 2.14                       | 2.22                               | 0.04  | 2.39E-08 | 5.48E-03               | 0.15   |
| rs11635491 | 15  | 56507033  | LIPC  | G       | A | 0.27 | 2.12                                 | 2.16                       | 2.20                               | 0.04  | 2.00E-07 | 5.34E-03               |        |
| rs1800588  | 15  | 56510967  | LIPC  | G       | A | 0.21 | 2.12                                 | 2.16                       | 2.26                               | 0.05  | 5.38E-10 | 7.47E-03               |        |
| rs2070895  | 15  | 56511231  | LIPC  | G       | A | 0.22 | 2.12                                 | 2.16                       | 2.26                               | 0.05  | 4.54E-10 | 7.55E-03               |        |
| rs8034802  | 15  | 56512084  | LIPC  | T       | A | 0.28 | 2.11                                 | 2.16                       | 2.20                               | 0.04  | 1.50E-08 | 6.52E-03               |        |
| rs8033940  | 15  | 56512134  | LIPC  | G       | A | 0.29 | 2.11                                 | 2.16                       | 2.20                               | 0.04  | 1.02E-08 | 6.60E-03               |        |
| rs261332   | 15  | 56514617  | LIPC  | G       | A | 0.21 | 2.12                                 | 2.16                       | 2.27                               | 0.05  | 6.48E-10 | 7.38E-03               |        |
| rs588136   | 15  | 56517790  | LIPC  | A       | G | 0.21 | 2.12                                 | 2.16                       | 2.26                               | 0.05  | 9.75E-10 | 7.51E-03               |        |
| rs261342   | 15  | 56518445  | LIPC  | C       | G | 0.22 | 2.12                                 | 2.16                       | 2.26                               | 0.06  | 2.85E-11 | 8.44E-03               |        |
| rs261341   | 15  | 56518859  | LIPC  | G       | A | 0.29 | 2.11                                 | 2.15                       | 2.20                               | 0.04  | 4.05E-08 | 5.85E-03               |        |
| rs261338   | 15  | 56522297  | LIPC  | G       | A | 0.17 | 2.12                                 | 2.16                       | 2.27                               | 0.04  | 1.73E-06 | 4.24E-03               |        |
| rs485671   | 15  | 56528426  | LIPC  | C       | A | 0.17 | 2.13                                 | 2.16                       | 2.23                               | 0.04  | 7.88E-06 | 3.51E-03               |        |
| rs485538   | 15  | 56528469  | LIPC  | A       | G | 0.17 | 2.12                                 | 2.16                       | 2.23                               | 0.04  | 4.32E-06 | 3.81E-03               |        |
| rs572410   | 15  | 56528676  | LIPC  | G       | C | 0.24 | 2.12                                 | 2.15                       | 2.22                               | 0.04  | 2.69E-06 | 4.24E-03               |        |
| rs261336   | 15  | 56529710  | LIPC  | A       | G | 0.16 | 2.12                                 | 2.16                       | 2.24                               | 0.04  | 2.64E-06 | 4.02E-03               |        |
| rs9989419  | 16  | 55542640  | CETP  | G       | A | 0.40 | 2.18                                 | 2.13                       | 2.08                               | -0.05 | 2.59E-12 | 9.33E-03               | 0.16   |
| rs12708967 | 16  | 55550712  | CETP  | A       | G | 0.19 | 2.16                                 | 2.10                       | 2.02                               | -0.06 | 1.60E-13 | 9.84E-03               |        |
| rs3764261  | 16  | 55550825  | CETP  | C       | A | 0.33 | 2.10                                 | 2.16                       | 2.21                               | 0.06  | 6.19E-19 | 1.35E-02               |        |
| rs12720918 | 16  | 55551713  | CETP  | A       | G | 0.28 | 2.16                                 | 2.12                       | 2.09                               | -0.04 | 1.15E-08 | 5.23E-03               |        |
| rs17231506 | 16  | 55552029  | CETP  | G       | A | 0.32 | 2.09                                 | 2.17                       | 2.21                               | 0.07  | 1.41E-19 | 1.39E-02               |        |
| rs1800775  | 16  | 55552737  | CETP  | C       | A | 0.49 | 2.08                                 | 2.14                       | 2.19                               | 0.05  | 8.75E-16 | 1.15E-02               |        |
| rs711752   | 16  | 55553712  | CETP  | G       | A | 0.43 | 2.08                                 | 2.15                       | 2.20                               | 0.06  | 2.19E-18 | 1.33E-02               |        |
| rs708272   | 16  | 55553789  | CETP  | G       | A | 0.43 | 2.08                                 | 2.15                       | 2.20                               | 0.06  | 1.02E-18 | 1.37E-02               |        |
| rs1864163  | 16  | 55554734  | CETP  | G       | A | 0.26 | 2.17                                 | 2.10                       | 2.06                               | -0.06 | 8.48E-16 | 1.17E-02               |        |
| rs7203984  | 16  | 55556759  | CETP  | A       | C | 0.19 | 2.16                                 | 2.10                       | 2.05                               | -0.06 | 1.19E-12 | 8.74E-03               |        |

|            |    |          |       |   |   |      |      |      |      |       |          |          |  |
|------------|----|----------|-------|---|---|------|------|------|------|-------|----------|----------|--|
| rs11508026 | 16 | 55556829 | CETP  | G | A | 0.43 | 2.08 | 2.15 | 2.20 | 0.06  | 7.52E-18 | 1.26E-02 |  |
| rs12720922 | 16 | 55558386 | CETP  | G | A | 0.18 | 2.16 | 2.09 | 2.05 | -0.06 | 8.69E-13 | 8.97E-03 |  |
| rs9939224  | 16 | 55560233 | CETP  | C | A | 0.20 | 2.16 | 2.10 | 2.03 | -0.06 | 5.63E-14 | 1.01E-02 |  |
| rs1532625  | 16 | 55562802 | CETP  | G | A | 0.44 | 2.08 | 2.15 | 2.20 | 0.06  | 2.61E-18 | 1.29E-02 |  |
| rs1532624  | 16 | 55562980 | CETP  | C | A | 0.44 | 2.08 | 2.15 | 2.20 | 0.06  | 4.69E-18 | 1.26E-02 |  |
| rs11076175 | 16 | 55563879 | CETP  | A | G | 0.17 | 2.16 | 2.09 | 2.04 | -0.06 | 5.66E-13 | 9.44E-03 |  |
| rs7499892  | 16 | 55564091 | CETP  | G | A | 0.17 | 2.16 | 2.09 | 2.04 | -0.07 | 1.27E-13 | 9.97E-03 |  |
| rs11076176 | 16 | 55564947 | CETP  | A | C | 0.16 | 2.15 | 2.11 | 2.06 | -0.05 | 2.07E-07 | 4.56E-03 |  |
| rs289714   | 16 | 55564952 | CETP  | A | G | 0.17 | 2.15 | 2.11 | 2.08 | -0.04 | 1.14E-06 | 4.05E-03 |  |
| rs289716   | 16 | 55566877 | CETP  | A | T | 0.31 | 2.11 | 2.14 | 2.22 | 0.04  | 1.06E-08 | 6.69E-03 |  |
| rs289717   | 16 | 55566889 | CETP  | G | A | 0.35 | 2.16 | 2.13 | 2.09 | -0.04 | 1.65E-07 | 4.94E-03 |  |
| rs289718   | 16 | 55567433 | CETP  | A | G | 0.32 | 2.11 | 2.14 | 2.23 | 0.04  | 2.45E-09 | 7.60E-03 |  |
| rs289719   | 16 | 55567442 | CETP  | G | A | 0.31 | 2.11 | 2.14 | 2.22 | 0.04  | 1.01E-08 | 6.58E-03 |  |
| rs4784744  | 16 | 55568686 | CETP  | G | A | 0.35 | 2.16 | 2.13 | 2.09 | -0.04 | 2.17E-07 | 4.69E-03 |  |
| rs291044   | 16 | 55568953 | CETP  | G | A | 0.35 | 2.16 | 2.13 | 2.09 | -0.04 | 2.62E-07 | 4.65E-03 |  |
| rs12720889 | 16 | 55570064 | CETP  | T | A | 0.30 | 2.11 | 2.15 | 2.22 | 0.04  | 3.91E-09 | 6.97E-03 |  |
| rs4784745  | 16 | 55572376 | CETP  | A | G | 0.35 | 2.16 | 2.13 | 2.08 | -0.04 | 4.07E-07 | 4.53E-03 |  |
| rs5880     | 16 | 55572592 | CETP  | G | C | 0.05 | 2.15 | 2.07 | 1.97 | -0.08 | 6.81E-08 | 4.39E-03 |  |
| rs5882     | 16 | 55573593 | CETP  | A | G | 0.32 | 2.12 | 2.14 | 2.21 | 0.04  | 5.42E-07 | 4.79E-03 |  |
| rs1800777  | 16 | 55574820 | CETP  | G | A | 0.04 | 2.14 | 2.06 | 2.00 | -0.09 | 1.79E-07 | 3.97E-03 |  |
| rs1801706  | 16 | 55575163 | CETP  | G | A | 0.18 | 2.12 | 2.16 | 2.24 | 0.04  | 6.98E-06 | 4.25E-03 |  |
| rs289743   | 16 | 55575297 | NLRC5 | A | G | 0.31 | 2.12 | 2.14 | 2.22 | 0.04  | 1.54E-08 | 6.30E-03 |  |

HMZ, homozygote ; HTZ, heterozygote



Table S4. SNPs from published GWASs (Kathiresan, 2008 and Willer, 2008) that did not reach significance in the WHII study.

| GWAS                        | Trait         | Chr      | Gene                                 | SNP        | Reported $\beta$ (sem) (meta-analysis) | Reported p-value (meta-analysis) | Reported $\beta$ (sem) (initial GWAS) | Reported p-value (initial GWAS) | p-value in WHII |
|-----------------------------|---------------|----------|--------------------------------------|------------|----------------------------------------|----------------------------------|---------------------------------------|---------------------------------|-----------------|
| Kathiresan, 2008, Nat Genet | LDL           | 19q13.32 | <i>APOE, APOC1, APOC4, APOC2</i>     | rs4420638  | 0.19 (0.02)                            | 1.00E-60                         | 0.25 (0.03)                           | 3.00E-13                        | not in chip     |
|                             | LDL           | 1p32.3   | <i>PCSK9</i>                         | rs11591147 | -0.47 (0.03)                           | 2.00E-44                         | not typed                             |                                 | not in chip     |
|                             | LDL           | 19p13    | <i>CILP2, PBX4</i>                   | rs16996148 | -0.10 (0.02)                           | 3.00E-08                         | -0.10 (0.05)                          | 4.00E-02                        | 6.01E-04        |
|                             | HDL           | 1q42.13  | <i>GALNT2</i>                        | rs4846914  | -0.07 (0.01)                           | 2.00E-13                         | -0.10 (0.03)                          | 3.00E-04                        | not in chip     |
|                             | HDL           | 9q31     | <i>ABCA1</i>                         | rs3890182  | -0.10 (0.02)                           | 3.00E-10                         | -0.17 (0.04)                          | 3.00E-05                        | 1.71E-02        |
|                             | HDL           | 11q23    | <i>APOA1-C3-A4-A5, ZNF259, BUD13</i> | rs28927680 | -0.13 (0.03)                           | 2.00E-05                         | -0.06 (0.05)                          | 3.10E-01                        | 1.58E-04        |
|                             | HDL           | 18q21    | <i>LIPG, ACAA2</i>                   | rs2156552  | -0.07 (0.01)                           | 2.00E-07                         | -0.09 (0.03)                          | 2.00E-02                        | 1.44E-02        |
|                             | Triglycerides | 1q42.13  | <i>GALNT2</i>                        | rs4846914  | 0.08 (0.01)                            | 7.00E-15                         | 0.11 (0.03)                           | 9.00E-05                        | not in chip     |
|                             | Triglycerides | 1p31.3   | <i>ANGPTL3, DOCK7, ATG4C</i>         | rs12130333 | -0.11 (0.02)                           | 2.00E-08                         | -0.12 (0.03)                          | 6.00E-04                        | not in chip     |
|                             | Triglycerides | 7q11     | <i>BCL7B, TBL2, MLXIPL</i>           | rs17145738 | -0.14 (0.02)                           | 7.00E-22                         | -0.12 (0.03)                          | 3.00E-03                        | 1.04E-05        |
| Willer, 2008, Nat Genet*    | LDL           | 19q13.32 | <i>APOE, APOC1, APOC4, APOC2</i>     | rs4420638  | 6.61mg/dl                              | 3.00E-43                         | 8.02mg/dl                             | 3.20E-21                        | not in chip     |
|                             | LDL           | 19       | <i>NCAN</i>                          | rs2228603  |                                        |                                  | 6.46mg/dl                             | 1.80E-07                        | 1.53E-05        |
|                             | HDL           | 9        | <i>GRIN3A, PPP3R2</i>                | rs1323432  | -0.03mg/dl                             | 7.70E-04                         | 1.93mg/dl                             | 2.50E-08                        | 1.98E-01        |
|                             | HDL           | 9q31     | <i>ABCA1</i>                         | rs4149274  | 0.82mg/dl                              | 1.20E-10                         | 1.51mg/dl                             | 7.40E-08                        | not in chip     |
|                             | HDL           | 18q21    | <i>LIPG</i>                          | rs4939883  |                                        |                                  | 1.87mg/dl                             | 1.40E-07                        | not in chip     |
|                             | HDL           | 1q42.13  | <i>GALNT2</i>                        | rs4846914  |                                        |                                  | 1.15mg/dl                             | 2.90E-07                        | 1.26E-02        |
|                             | Triglycerides | 11q23    | <i>APOA5</i>                         | rs964184   |                                        |                                  | 18.12mg/dl                            | 1.50E-16                        | not in chip     |
|                             | Triglycerides | 8p21     | <i>LPL</i>                           | rs6993414  |                                        |                                  | 14.2mg/dl                             | 1.40E-13                        | not in chip     |
|                             | Triglycerides | 8        | <i>TRIB1</i>                         | rs2954029  |                                        |                                  | 6.42mg/dl                             | 2.80E-08                        | 1.54E-05        |
|                             | Triglycerides | 19       | <i>NCAN</i>                          | rs10401969 |                                        |                                  | 12.28mg/dl                            | 2.30E-07                        | not in chip     |

\*Data reported as per-allele change in mean lipid value (mg/dl).

## References

- (1) Kathiresan S, Melander O, Guiducci C, Surti A, Burtt NP, Rieder MJ et al. Six new loci associated with blood low-density lipoprotein cholesterol, high-density lipoprotein cholesterol or triglycerides in humans. *Nat Genet* 2008; 40:189-197.
- (2) Willer CJ, Sanna S, Jackson AU, Scuteri A, Bonnycastle LL, Clarke R et al. Newly identified loci that influence lipid concentrations and risk of coronary artery disease. *Nat Genet* 2008; 40:161-169

Table S5. Mean lipid values and gene count score for approximate quintiles of WHII individuals.

| Traits                  | Number of individuals | Mean genescore | Trait mean | 95CI- | 95CI+ |
|-------------------------|-----------------------|----------------|------------|-------|-------|
| <b>LDL-C mmol/l</b>     |                       |                |            |       |       |
| 1                       | 1,022                 | 22.33          | 3.96       | 3.90  | 4.02  |
| 2                       | 842                   | 25.54          | 4.25       | 4.18  | 4.32  |
| 3                       | 991                   | 27.50          | 4.40       | 4.34  | 4.46  |
| 4                       | 876                   | 29.44          | 4.59       | 4.52  | 4.65  |
| 5                       | 798                   | 32.21          | 4.79       | 4.72  | 4.86  |
| <b>ApoB g/l</b>         |                       |                |            |       |       |
| 1                       | 1,031                 | 23.47          | 1.12       | 1.10  | 1.14  |
| 2                       | 975                   | 26.54          | 1.21       | 1.19  | 1.23  |
| 3                       | 1,114                 | 28.50          | 1.27       | 1.25  | 1.28  |
| 4                       | 948                   | 30.45          | 1.30       | 1.28  | 1.32  |
| 5                       | 540                   | 32.96          | 1.38       | 1.36  | 1.41  |
| <b>TG mmol/l</b>        |                       |                |            |       |       |
| 1                       | 1,046                 | 8.744741       | 1.05       | 1.01  | 1.08  |
| 2                       | 1,155                 | 11.5645        | 1.16       | 1.12  | 1.19  |
| 3                       | 699                   | 13             | 1.22       | 1.17  | 1.27  |
| 4                       | 1,007                 | 14.43694       | 1.30       | 1.26  | 1.35  |
| 5                       | 701                   | 17.28103       | 1.52       | 1.46  | 1.59  |
| <b>HDL-C mmol/l</b>     |                       |                |            |       |       |
| 1                       | 1,360                 | 8.87           | 1.26       | 1.25  | 1.28  |
| 2                       | 654                   | 11.00          | 1.33       | 1.30  | 1.36  |
| 3                       | 1,373                 | 12.48          | 1.40       | 1.38  | 1.42  |
| 4                       | 527                   | 14.00          | 1.48       | 1.44  | 1.51  |
| 5                       | 679                   | 15.79          | 1.54       | 1.51  | 1.57  |
| <b>ApoAI g/l</b>        |                       |                |            |       |       |
| 1                       | 1,159                 | 6.98           | 2.04       | 2.02  | 2.06  |
| 2                       | 745                   | 9.00           | 2.09       | 2.07  | 2.11  |
| 3                       | 1,625                 | 10.50          | 2.15       | 2.14  | 2.17  |
| 4                       | 626                   | 12.00          | 2.21       | 2.19  | 2.24  |
| 5                       | 453                   | 13.48          | 2.29       | 2.26  | 2.33  |
| <b>ApoB/ApoAI ratio</b> |                       |                |            |       |       |
| 1                       | 1,221                 | 20.39          | 0.54       | 0.53  | 0.55  |
| 2                       | 1,012                 | 23.51          | 0.58       | 0.57  | 0.59  |
| 3                       | 560                   | 25.00          | 0.61       | 0.60  | 0.62  |
| 4                       | 976                   | 26.45          | 0.64       | 0.63  | 0.65  |
| 5                       | 839                   | 29.05          | 0.67       | 0.66  | 0.69  |

Table S6. SNPs independently associating with lipid and apolipoprotein traits in genes/regions previously detected by GWASs or candidate gene studies in the WH-II study.

| <i>SNP</i>   | <i>Chr</i> | <i>Basepairs</i> | <i>Gene</i>       | <i>cSNPs</i> | <i>MAF</i> | <i>Previous GWAS</i>                                                                      | <i>Common HMZ<sup>c</sup><br/>mean</i> | <i>HTZ<sup>d</sup> mean</i> | <i>Rare HMZ<sup>c</sup><br/>mean</i> | <i>Beta</i> | <i>p-value<sup>a</sup></i> | <i>StepAIC<sup>b*</sup></i> |
|--------------|------------|------------------|-------------------|--------------|------------|-------------------------------------------------------------------------------------------|----------------------------------------|-----------------------------|--------------------------------------|-------------|----------------------------|-----------------------------|
| <b>LDL-C</b> |            |                  |                   |              |            |                                                                                           |                                        |                             |                                      |             |                            |                             |
| rs11591147   | 1          | 55278235         | <i>PCSK9</i>      | L46R         | 0.02       | <sup>1</sup>                                                                              | 4.38                                   | 3.84                        | 2.98                                 | -0.55       | 9.28E-12                   | 4.95E-12                    |
| rs4970834    | 1          | 109616403        | <i>CELSR2</i>     |              | 0.18       |                                                                                           | 4.42                                   | 4.27                        | 4.08                                 | -0.16       | 5.18E-09                   | 1.16E-01                    |
| rs12740374   | 1          | 109619113        | <i>CELSR2</i>     |              | 0.21       | <sup>2</sup> ; LD with rs646776 from <sup>3</sup>                                         | 4.43                                   | 4.28                        | 4.12                                 | -0.15       | 1.82E-09                   | 4.73E-04                    |
| rs629301     | 1          | 109619829        | <i>CELSR2</i>     |              | 0.21       | LD with rs12740374 from <sup>2</sup>                                                      | 4.43                                   | 4.28                        | 4.14                                 | -0.15       | 6.50E-09                   | 1.24E-03                    |
| rs693        | 2          | 21085700         | <i>APOB</i>       | T2488T       | 0.48       |                                                                                           | 4.48                                   | 4.34                        | 4.27                                 | -0.11       | 3.86E-08                   | 1.00E-01                    |
| rs934197     | 2          | 21120966         | <i>APOB</i>       |              | 0.33       |                                                                                           | 4.30                                   | 4.40                        | 4.53                                 | 0.12        | 3.43E-08                   | 1.16E-02                    |
| rs562338     | 2          | 21141826         | <i>APOB</i>       |              | 0.18       | <sup>4, 5</sup> ; LD with rs515135 from <sup>2</sup> ; LD with rs506585 from <sup>3</sup> | 4.43                                   | 4.24                        | 4.16                                 | -0.18       | 1.21E-11                   | 8.86E-07                    |
| rs4299376    | 2          | 43926080         | <i>ABCG8</i>      |              | 0.32       | LD with rs6544713 from <sup>2</sup>                                                       | 4.28                                   | 4.42                        | 4.53                                 | 0.13        | 8.70E-10                   | 1.33E-09                    |
| rs12916      | 5          | 74692295         | <i>HMGCR</i>      |              | 0.41       | LD with rs3846663 from <sup>2</sup> ; LD with rs12654264 <sup>1</sup>                     | 4.26                                   | 4.39                        | 4.51                                 | 0.12        | 6.66E-09                   | 2.22E-05                    |
| rs3804231    | 5          | 74732535         | <i>HMGCR</i>      |              | 0.13       |                                                                                           | 4.33                                   | 4.46                        | 4.62                                 | 0.14        | 5.15E-06                   | 2.59E-02                    |
| rs2072560    | 11         | 116167036        | <i>APOA5</i>      |              | 0.06       |                                                                                           | 4.34                                   | 4.51                        | 5.33                                 | 0.22        | 2.36E-07                   | 2.39E-07                    |
| rs17231506   | 16         | 55552029         | <i>CETP</i>       |              | 0.32       |                                                                                           | 4.44                                   | 4.33                        | 4.22                                 | -0.11       | 5.02E-07                   | 4.63E-07                    |
| rs1529729    | 19         | 11024562         | <i>LDLR</i>       |              | 0.45       |                                                                                           | 4.28                                   | 4.39                        | 4.44                                 | 0.09        | 6.71E-06                   | 1.13E-01                    |
| rs17248720   | 19         | 11059187         | <i>LDLR</i>       |              | 0.13       |                                                                                           | 4.45                                   | 4.14                        | 3.81                                 | -0.31       | 7.86E-25                   | 2.00E-16                    |
| rs8110695    | 19         | 11067530         | <i>LDLR</i>       |              | 0.22       |                                                                                           | 4.43                                   | 4.27                        | 4.21                                 | -0.14       | 1.12E-08                   | 1.51E-01                    |
| rs2228671    | 19         | 11071912         | <i>LDLR</i>       | C27C         | 0.13       | <sup>6</sup>                                                                              | 4.42                                   | 4.21                        | 4.18                                 | -0.18       | 6.52E-10                   | 1.08E-04                    |
| rs1531517    | 19         | 49934013         | <i>BCL3</i>       |              | 0.07       |                                                                                           | 4.40                                   | 4.17                        | 4.08                                 | -0.22       | 6.26E-08                   | 1.23E-02                    |
| rs10402271   | 19         | 50021054         | <i>BCL3/PVRL2</i> |              | 0.33       |                                                                                           | 4.26                                   | 4.44                        | 4.53                                 | 0.15        | 2.06E-12                   | 9.72E-06                    |
| rs519113     | 19         | 50068124         | <i>PVRL2</i>      |              | 0.24       |                                                                                           | 4.42                                   | 4.31                        | 4.18                                 | -0.12       | 9.37E-07                   | 1.42E-02                    |
| rs6859       | 19         | 50073874         | <i>PVRL2</i>      |              | 0.41       |                                                                                           | 4.27                                   | 4.38                        | 4.52                                 | 0.12        | 3.53E-08                   | 2.95E-03                    |
| rs283813     | 19         | 50081014         | <i>PVRL2</i>      |              | 0.07       |                                                                                           | 4.39                                   | 4.23                        | 3.70                                 | -0.19       | 2.51E-06                   | 6.49E-05                    |
| rs2075650    | 19         | 50087459         | <i>TOMM40</i>     |              | 0.14       | <sup>6</sup>                                                                              | 4.31                                   | 4.51                        | 4.87                                 | 0.23        | 1.14E-14                   | 2.45E-02                    |
| rs12721046   | 19         | 50113094         | <i>APOC1</i>      |              | 0.15       |                                                                                           | 4.30                                   | 4.51                        | 4.74                                 | 0.21        | 7.58E-14                   | 1.16E-01                    |
| rs12721109   | 19         | 50139061         | <i>APOC4</i>      |              | 0.02       |                                                                                           | 4.39                                   | 3.82                        | 4.32                                 | -0.54       | 5.06E-14                   | 9.44E-08                    |
| <b>ApoB</b>  |            |                  |                   |              |            |                                                                                           |                                        |                             |                                      |             |                            |                             |
| rs11591147   | 1          | 55278235         | <i>PCSK9</i>      | L46R         | 0.02       | <sup>1, 3</sup>                                                                           | 1.28                                   | 1.14                        | 0.94                                 | -0.12       | 1.89E-10                   | 1.08E-10                    |
| rs4970834    | 1          | 109616403        | <i>CELSR2</i>     |              | 0.18       |                                                                                           | 1.29                                   | 1.25                        | 1.18                                 | -0.04       | 2E-08                      | 1.46E-01                    |
| rs12740374   | 1          | 109619113        | <i>CELSR2</i>     |              | 0.21       | <sup>2</sup>                                                                              | 1.29                                   | 1.25                        | 1.19                                 | -0.03       | 4.7E-09                    | 2.13E-04                    |
| rs629301     | 1          | 109619829        | <i>CELSR2</i>     |              | 0.21       |                                                                                           | 1.29                                   | 1.25                        | 1.19                                 | -0.03       | 1.76E-08                   | 6.14E-04                    |
| rs562338     | 2          | 21141826         | <i>APOB</i>       |              | 0.18       | <sup>5, 4</sup>                                                                           | 1.29                                   | 1.24                        | 1.19                                 | -0.05       | 6E-13                      | 4.77E-09                    |
| rs754523     | 2          | 21165196         | <i>APOB</i>       |              | 0.33       |                                                                                           | 1.25                                   | 1.27                        | 1.32                                 | 0.02        | 1.11E-06                   | 1.22E-02                    |
| rs4299376    | 2          | 43926080         | <i>ABCG8</i>      |              | 0.32       |                                                                                           | 1.25                                   | 1.28                        | 1.32                                 | 0.03        | 7.6E-08                    | 1.03E-07                    |

|               |    |           |                   |       |      |                                                                          |      |      |      |       |          |          |
|---------------|----|-----------|-------------------|-------|------|--------------------------------------------------------------------------|------|------|------|-------|----------|----------|
| rs12916       | 5  | 74692295  | <i>HMGCR</i>      |       | 0.41 |                                                                          | 1.25 | 1.27 | 1.31 | 0.02  | 3.34E-06 | 2.42E-06 |
| rs180327      | 11 | 116128869 | <i>BUD13</i>      |       | 0.36 |                                                                          | 1.24 | 1.29 | 1.29 | 0.02  | 7.7E-07  | 4.45E-02 |
| rs2072560     | 11 | 116167036 | <i>APOA5</i>      |       | 0.06 |                                                                          | 1.26 | 1.34 | 1.58 | 0.07  | 1.4E-12  | 8.65E-09 |
| rs9804646     | 11 | 116170289 | <i>APOA4</i>      |       | 0.09 |                                                                          | 1.28 | 1.22 | 1.22 | -0.04 | 1.25E-06 | 2.29E-04 |
| rs3764261     | 16 | 55550825  | <i>CETP</i>       |       | 0.33 | 7, 4                                                                     | 1.29 | 1.26 | 1.23 | -0.02 | 1.52E-06 | 1.12E-06 |
| rs17248720    | 19 | 11059187  | <i>LDLR</i>       |       | 0.13 |                                                                          | 1.29 | 1.22 | 1.14 | -0.06 | 2.1E-15  | 3.31E-13 |
| rs2228671     | 19 | 11071912  | <i>LDLR</i>       |       | 0.13 | 6                                                                        | 1.28 | 1.24 | 1.23 | -0.03 | 5E-06    | 1.27E-03 |
| rs1531517     | 19 | 49934013  | <i>BCL3</i>       |       | 0.07 |                                                                          | 1.28 | 1.20 | 1.15 | -0.07 | 1.96E-13 | 2.15E-03 |
| rs10402271    | 19 | 50021054  | <i>BCL3/PVRL2</i> |       | 0.33 |                                                                          | 1.24 | 1.29 | 1.32 | 0.04  | 7.05E-13 | 1.69E-05 |
| rs519113      | 19 | 50068124  | <i>PVRL2</i>      |       | 0.24 |                                                                          | 1.29 | 1.25 | 1.22 | -0.03 | 2.14E-08 | 4.99E-02 |
| rs6859        | 19 | 50073874  | <i>PVRL2</i>      |       | 0.41 |                                                                          | 1.24 | 1.28 | 1.32 | 0.03  | 1.49E-10 | 2.88E-03 |
| rs283813      | 19 | 50081014  | <i>PVRL2</i>      |       | 0.07 |                                                                          | 1.28 | 1.23 | 1.09 | -0.05 | 2.61E-08 | 8.63E-07 |
| rs157580      | 19 | 50087106  | <i>TOMM40</i>     |       | 0.40 | 6                                                                        | 1.30 | 1.26 | 1.23 | -0.02 | 6.55E-07 | 4.66E-07 |
| rs405509      | 19 | 50100676  | <i>APOE</i>       |       | 0.48 |                                                                          | 1.25 | 1.27 | 1.30 | 0.03  | 1.89E-08 | 2.80E-10 |
| rs12721109    | 19 | 50139061  | <i>APOC4</i>      |       | 0.02 |                                                                          | 1.28 | 1.10 | 1.05 | -0.15 | 3.88E-19 | 9.28E-07 |
| <b>HDL-C</b>  |    |           |                   |       |      |                                                                          |      |      |      |       |          |          |
| rs301         | 8  | 19861214  | <i>LPL</i>        |       | 0.25 |                                                                          | 1.41 | 1.46 | 1.52 | 0.04  | 9.25E-11 | 4.75E-06 |
| rs17410962    | 8  | 19892360  | <i>LPL</i>        |       | 0.13 | LD with rs12678919 from <sup>2</sup>                                     | 1.42 | 1.48 | 1.52 | 0.04  | 1.31E-07 | 2.55E-02 |
| rs11820589    | 11 | 116139072 | <i>BUD13</i>      | L148P | 0.06 |                                                                          | 1.44 | 1.39 | 1.14 | -0.05 | 7.66E-06 | 1.54E-06 |
| rs662799      | 11 | 116168917 | <i>APOA5</i>      |       | 0.06 |                                                                          | 1.44 | 1.37 | 1.28 | -0.06 | 6.52E-08 | 1.07E-08 |
| rs4775041     | 15 | 56461987  | <i>LIPC</i>       |       | 0.30 | 4                                                                        | 1.41 | 1.43 | 1.53 | 0.03  | 2.05E-07 | 6.63E-08 |
| rs261342      | 15 | 56518445  | <i>LIPC</i>       |       | 0.22 |                                                                          | 1.41 | 1.45 | 1.54 | 0.04  | 6.28E-08 | 2.12E-08 |
| rs9989419     | 16 | 55542640  | <i>CETP</i>       |       | 0.40 | 4                                                                        | 1.49 | 1.42 | 1.34 | -0.05 | 9.76E-21 | 1.11E-02 |
| rs12708967    | 16 | 55550712  | <i>CETP</i>       |       | 0.19 |                                                                          | 1.47 | 1.38 | 1.29 | -0.06 | 8.79E-23 | 5.02E-05 |
| rs17231506    | 16 | 55552029  | <i>CETP</i>       |       | 0.32 | LD with rs173539 from <sup>2</sup> ; LD with rs3764261 from <sup>3</sup> | 1.37 | 1.47 | 1.56 | 0.07  | 2.21E-36 | 1.52E-06 |
| rs711752      | 16 | 55553712  | <i>CETP</i>       |       | 0.43 |                                                                          | 1.35 | 1.45 | 1.52 | 0.06  | 6.48E-32 | 6.86E-03 |
| rs5883        | 16 | 55564854  | <i>CETP</i>       | F287F | 0.06 |                                                                          | 1.42 | 1.51 | 1.54 | 0.05  | 5.92E-06 | 2.46E-15 |
| rs5880        | 16 | 55572592  | <i>CETP</i>       | P309A | 0.05 |                                                                          | 1.44 | 1.34 | 1.20 | -0.08 | 6.90E-12 | 1.93E-03 |
| <b>ApoAI</b>  |    |           |                   |       |      |                                                                          |      |      |      |       |          |          |
| rs301         | 8  | 19861214  | <i>LPL</i>        |       | 0.25 | LD with rs331 from <sup>3</sup>                                          | 2.12 | 2.15 | 2.21 | 0.04  | 4.16E-06 | 2.41E-06 |
| rs1883025     | 9  | 106704122 | <i>ABCA1</i>      |       | 0.26 | <sup>2</sup>                                                             | 2.16 | 2.12 | 2.09 | -0.04 | 4.81E-06 | 7.15E-06 |
| rs4775041     | 15 | 56461987  | <i>LIPC</i>       |       | 0.30 | 4                                                                        | 2.12 | 2.14 | 2.22 | 0.04  | 2.39E-08 | 5.80E-09 |
| rs261342      | 15 | 56518445  | <i>LIPC</i>       |       | 0.22 |                                                                          | 2.12 | 2.16 | 2.26 | 0.06  | 2.85E-11 | 7.93E-12 |
| rs12708967    | 16 | 55550712  | <i>CETP</i>       |       | 0.19 |                                                                          | 2.16 | 2.10 | 2.02 | -0.06 | 1.6E-13  | 2.46E-02 |
| rs17231506    | 16 | 55552029  | <i>CETP</i>       |       | 0.32 |                                                                          | 2.09 | 2.17 | 2.21 | 0.07  | 1.41E-19 | 8.78E-12 |
| rs1864163     | 16 | 55554734  | <i>CETP</i>       |       | 0.26 |                                                                          | 2.17 | 2.10 | 2.06 | -0.06 | 8.48E-16 | 1.57E-01 |
| rs5880        | 16 | 55572592  | <i>CETP</i>       | P390A | 0.05 |                                                                          | 2.15 | 2.07 | 1.97 | -0.08 | 6.81E-08 | 6.69E-03 |
| rs1801706     | 16 | 55575163  | <i>CETP</i>       |       | 0.18 |                                                                          | 2.12 | 2.16 | 2.24 | 0.04  | 6.98E-06 | 1.20E-06 |
| Triglycerides |    |           |                   |       |      |                                                                          |      |      |      |       |          |          |

|            |    |           |                              |       |      |                                                                                                                              |      |      |      |       |          |          |
|------------|----|-----------|------------------------------|-------|------|------------------------------------------------------------------------------------------------------------------------------|------|------|------|-------|----------|----------|
| rs1260326  | 2  | 27584444  | <i>GCKR</i>                  | P446L | 0.40 | <sup>2,7,3</sup>                                                                                                             | 1.38 | 1.43 | 1.63 | 0.06  | 1.83E-07 | 2.21E-07 |
| rs17145713 | 7  | 72542746  | <i>BAZ1B</i>                 |       | 0.20 |                                                                                                                              | 1.50 | 1.36 | 1.25 | -0.09 | 5.29E-10 | 6.05E-10 |
| rs285      | 8  | 19859469  | <i>LPL</i>                   |       | 0.47 |                                                                                                                              | 1.54 | 1.45 | 1.31 | -0.07 | 2.65E-09 | 6.15E-05 |
| rs331      | 8  | 19864685  | <i>LPL</i>                   |       | 0.27 | LD with rs326 from <sup>8</sup>                                                                                              | 1.51 | 1.39 | 1.24 | -0.08 | 1.73E-11 | 1.40E-02 |
| rs3289     | 8  | 19867472  | <i>LPL</i>                   |       | 0.03 |                                                                                                                              | 1.43 | 1.70 | 1.04 | 0.16  | 3.16E-06 | 5.58E-06 |
| rs3916027  | 8  | 19869148  | <i>LPL</i>                   |       | 0.27 | LD with rs326 from <sup>8</sup>                                                                                              | 1.51 | 1.40 | 1.24 | -0.08 | 1.04E-10 | 2.55E-02 |
| rs10503669 | 8  | 19891970  | <i>LPL</i>                   |       | 0.11 | <sup>4</sup> , LD with rs10096633 from <sup>6</sup> , LD with rs12678919 from <sup>2</sup> , LD with rs328 from <sup>3</sup> | 1.48 | 1.30 | 1.08 | -0.11 | 1.05E-09 | 1.61E-02 |
| rs17321515 | 8  | 126555591 | <i>TRIB1</i>                 |       | 0.47 | <sup>4</sup>                                                                                                                 | 1.53 | 1.43 | 1.37 | -0.05 | 3.47E-06 | 4.62E-06 |
| rs17108993 | 10 | 95354023  | <i>RBP4</i>                  |       | 0.03 |                                                                                                                              | 1.42 | 1.72 | 1.53 | 0.14  | 8.04E-06 | 8.04E-06 |
| rs6589565  | 11 | 116145447 | <i>BUD13</i>                 |       | 0.07 |                                                                                                                              | 1.39 | 1.81 | 1.92 | 0.19  | 4.49E-20 | 5.73E-02 |
| rs12286037 | 11 | 116157417 | <i>ZNF259</i>                |       | 0.06 | <sup>4</sup> ; LD with rs12272004 from <sup>6</sup> ; LD with rs28927680 from <sup>1</sup>                                   | 1.42 | 1.64 | 1.83 | 0.13  | 1.55E-09 | 1.01E-12 |
| rs651821   | 11 | 116167789 | <i>APOA5</i>                 |       | 0.06 | LD with rs662799 from <sup>3</sup>                                                                                           | 1.39 | 1.81 | 2.04 | 0.21  | 8.89E-21 | 3.35E-03 |
| rs10750097 | 11 | 116169250 | <i>APOA4</i>                 |       | 0.21 |                                                                                                                              | 1.38 | 1.53 | 1.70 | 0.09  | 1.26E-10 | 5.46E-03 |
| rs33989105 | 11 | 116205352 | <i>APOC3</i>                 |       | 0.25 |                                                                                                                              | 1.40 | 1.47 | 1.67 | 0.07  | 1.75E-07 | 1.72E-03 |
| rs5072     | 11 | 116212793 | <i>APOA1/</i><br><i>NCAN</i> |       | 0.08 |                                                                                                                              | 1.41 | 1.60 | 1.84 | 0.11  | 1.74E-07 | 1.21E-01 |
| rs2304128  | 19 | 19607151  | <i>GMIP</i>                  |       | 0.09 |                                                                                                                              | 1.47 | 1.31 | 0.99 | -0.10 | 3.15E-07 | 3.74E-07 |

<sup>a</sup>P-value for association adjusted for age and gender.

<sup>b</sup>P-value for the specified SNP in the final stepwise regression model, i.e. adjusted for age, gender and all other SNPs in this final model

<sup>c</sup>HMZ, homozygote ; <sup>d</sup> HTZ, heterozygote

LDL-C, low density lipoprotein –cholesterol; ApoB, apolipoprotein B; HDL-C, high density lipoprotein –cholesterol; ApoAI, apolipoprotein AI;

LD, linkage disequilibrium; StepAIC, stepwise selection scheme using the Akaike's Information Criterion (AIC)<sup>9</sup>.

## References

1. Kathiresan,S., Melander,O., Guiducci,C., Surti,A., Burttt,N.P., Rieder,M.J., Cooper,G.M., Roos,C., Voight,B.F., Havulinna,A.S. et al. (2008). Six new loci associated with blood low-density lipoprotein cholesterol, high-density lipoprotein cholesterol or triglycerides in humans. *Nat. Genet.* *40*, 189-197
2. Kathiresan,S., Willer,C.J., Peloso,G.M., Demissie,S., Musunuru,K., Schadt,E.E., Kaplan,L., Bennett,D., Li,Y., Tanaka,T. et al. (2009). Common variants at 30 loci contribute to polygenic dyslipidemia. *Nat. Genet.* *41*, 56-65

3. Chasman,D.I., Pare,G., Zee,R.Y.L., Parker,A.N., Cook,N.R., Buring,J.E., Kwiatkowski,D.J., Rose,L.M., Smith,J.D., Williams,P.T. et al. (2008). Genetic Loci Associated With Plasma Concentration of Low-Density Lipoprotein Cholesterol, High-Density Lipoprotein Cholesterol, Triglycerides, Apolipoprotein A1, and Apolipoprotein B Among 6382 White Women in Genome-Wide Analysis With Replication. *Circ Cardiovasc Genet* *1*, 21-30
4. Willer,C.J., Sanna,S., Jackson,A.U., Scuteri,A., Bonnycastle,L.L., Clarke,R., Heath,S.C., Timpson,N.J., Najjar,S.S., Stringham,H.M. et al. (2008). Newly identified loci that influence lipid concentrations and risk of coronary artery disease. *Nat. Genet.* *40*, 161-169
5. Sandhu,M.S., Waterworth,D.M., Debenham,S.L., Wheeler,E., Papadakis,K., Zhao,J.H., Song,K., Yuan,X., Johnson,T., Ashford,A. et al. (2008). LDL-cholesterol concentrations: a genome-wide association study. *Lancet* *371*, 483-491
6. Aulchenko,Y.S., Ripatti,S., Lindqvist,I., Boomsma,D., Heid,I.M., Pramstaller,P.P., Penninx,B.W., Janssens,A.C., Wilson,J.F., Spector,T. et al. (2009). Loci influencing lipid levels and coronary heart disease risk in 16 European population cohorts. *Nat. Genet.* *41*, 47-55
7. Sabatti,C., Service,S.K., Hartikainen,A.L., Pouta,A., Ripatti,S., Brodsky,J., Jones,C.G., Zaitlen,N.A., Varilo,T., Kaakinen,M. et al. (2009). Genome-wide association analysis of metabolic traits in a birth cohort from a founder population. *Nat. Genet* *41*, 35-46
8. Kooner,J.S., Chambers,J.C., Aguilar-Salinas,C.A., Hinds,D.A., Hyde,C.L., Warnes,G.R., Gomez Perez,F.J., Frazer,K.A., Elliott,P., Scott,J. et al. (2008). Genome-wide scan identifies variation in MLXIPL associated with plasma triglycerides. *Nat. Genet.* *40*, 149-151
9. Akaike,H. (1974). A new look at the statistical model identification. *IEEE Transactions on Automatic Control* *19*, 716-723

Table S7. Results from the meta-analysis of SNPs with MAF>0.01 and p-value cut off of  $10^{-5}$  and their association with lipid and apolipoprotein traits

| SNP               | Chr | BP        | Nearest gene   | Alleles |   | MAF  | Common HMZ <sup>c</sup> mean | HTZ <sup>d</sup> mean | Rare HMZ <sup>c</sup> mean | Beta  | P-value                | R2 (univariate) | Meta-analysis |
|-------------------|-----|-----------|----------------|---------|---|------|------------------------------|-----------------------|----------------------------|-------|------------------------|-----------------|---------------|
|                   |     |           |                | 1       | 2 |      |                              |                       |                            |       |                        |                 | P-value       |
| <b>LDL-C</b>      |     |           |                |         |   |      |                              |                       |                            |       |                        |                 |               |
| rs822430          | 1   | 155168883 | <i>C1orf92</i> | A       | G | 0.48 | 4.48                         | 4.33                  | 4.31                       | -0.09 | 2.76E-05               | 0.004           | 2.66E-02      |
| <b>rs12467409</b> | 2   | 203102593 | <i>BMPR2</i>   | C       | A | 0.12 | 4.34                         | 4.45                  | 4.71                       | 0.13  | 7.50E-05               | 0.003           | 2.65E-06      |
| <b>rs3184504</b>  | 12  | 110368991 | <i>SH2B3</i>   | G       | A | 0.48 | 4.42                         | 4.38                  | 4.26                       | -0.08 | 6.90E-05 <sup>a</sup>  | 0.003           | 7.52E-06      |
| rs4568            | 14  | 23829849  | <i>DHRS1</i>   | G       | A | 0.24 | 4.33                         | 4.37                  | 4.66                       | 0.10  | 2.03E-05               | 0.003           | 1.57E-03      |
| rs17184682        | 14  | 23863602  | <i>ADCY4</i>   | A       | C | 0.11 | 4.34                         | 4.43                  | 4.84                       | 0.13  | 5.27E-05               | 0.003           | 7.35E-04      |
| rs987644          | 14  | 78313798  | <i>NRXN3</i>   | G       | A | 0.19 | 4.41                         | 4.29                  | 4.20                       | -0.11 | 2.40E-05               | 0.004           | 2.30E-03      |
| <b>rs1529729</b>  | 19  | 11024562  | <i>SMARCA4</i> | A       | G | 0.45 | 4.28                         | 4.39                  | 4.44                       | 0.09  | 6.71E-06               | 0.004           | 4.52E-08      |
| rs1531517         | 19  | 49934013  | <i>BCL3</i>    | G       | A | 0.07 | 4.40                         | 4.17                  | 4.08                       | -0.22 | 6.26E-08 <sup>++</sup> | 0.006           | 2.22E-16      |
| <b>rs10402271</b> | 19  | 50021054  | <i>PVRL2</i>   | A       | C | 0.33 | 4.26                         | 4.44                  | 4.53                       | 0.15  | 2.06E-12 <sup>b</sup>  | 0.010           | 0.00E+00      |
| rs4803763         | 19  | 50049131  | <i>PVRL2</i>   | G       | C | 0.26 | 4.29                         | 4.43                  | 4.58                       | 0.15  | 2.20E-10 <sup>b</sup>  | 0.008           | 0.00E+00      |
| <b>rs519113</b>   | 19  | 50068124  | <i>PVRL2</i>   | C       | G | 0.24 | 4.42                         | 4.31                  | 4.18                       | -0.12 | 9.37E-07 <sup>b</sup>  | 0.005           | 1.25E-11      |
| rs387976          | 19  | 50070900  | <i>PVRL2</i>   | A       | C | 0.35 | 4.43                         | 4.34                  | 4.22                       | -0.10 | 5.98E-06 <sup>a</sup>  | 0.004           | 1.33E-08      |
| <b>rs6859</b>     | 19  | 50073874  | <i>PVRL2</i>   | G       | A | 0.41 | 4.27                         | 4.38                  | 4.52                       | 0.12  | 3.53E-08 <sup>a</sup>  | 0.007           | 7.83E-10      |
| <b>rs283813</b>   | 19  | 50081014  | <i>PVRL2</i>   | T       | A | 0.07 | 4.39                         | 4.23                  | 3.70                       | -0.19 | 2.51E-06               | 0.004           | 1.85E-08      |
| rs17836542        | 19  | 60241198  | <i>GP6</i>     | C       | G | 0.05 | 4.38                         | 4.21                  | 3.70                       | -0.19 | 9.56E-05               | 0.004           | 2.13E-02      |
| <b>ApoB</b>       |     |           |                |         |   |      |                              |                       |                            |       |                        |                 |               |



|                      |    |           |                |   |   |      |      |      |      |       |          |       |          |
|----------------------|----|-----------|----------------|---|---|------|------|------|------|-------|----------|-------|----------|
| rs4299376            | 2  | 43926080  | <i>ABCG8</i>   | A | C | 0.32 | 1.25 | 1.28 | 1.32 | 0.03  | 7.60E-08 | 0.006 | -        |
| rs1459047            | 6  | 21308369  | <i>CDKAL1</i>  | A | G | 0.07 | 1.26 | 1.31 | 1.33 | 0.04  | 6.06E-05 | 0.003 | -        |
| rs4568               | 14 | 23829849  | <i>DHRS1</i>   | G | A | 0.24 | 1.26 | 1.27 | 1.36 | 0.02  | 2.41E-05 | 0.003 | -        |
| rs1531517            | 19 | 49934013  | <i>BCL3</i>    | G | A | 0.07 | 1.28 | 1.20 | 1.15 | -0.07 | 1.96E-13 | 0.010 | -        |
| rs10402271           | 19 | 50021054  | <i>PVRL2</i>   | A | C | 0.36 | 1.24 | 1.29 | 1.32 | 0.04  | 7.05E-13 | 0.010 | -        |
| rs4803763            | 19 | 50049131  | <i>PVRL2</i>   | G | C | 0.26 | 1.25 | 1.29 | 1.34 | 0.04  | 2.75E-12 | 0.009 | -        |
| rs519113             | 19 | 50068124  | <i>PVRL2</i>   | C | G | 0.24 | 1.29 | 1.25 | 1.22 | -0.03 | 2.14E-08 | 0.006 | -        |
| rs387976             | 19 | 50070900  | <i>PVRL2</i>   | A | C | 0.35 | 1.29 | 1.26 | 1.22 | -0.03 | 1.54E-07 | 0.006 | -        |
| rs6859               | 19 | 50073874  | <i>PVRL2</i>   | G | A | 0.41 | 1.24 | 1.28 | 1.32 | 0.03  | 1.49E-10 | 0.009 | -        |
| rs283813             | 19 | 50081014  | <i>PVRL2</i>   | T | A | 0.07 | 1.28 | 1.23 | 1.09 | -0.05 | 2.61E-08 | 0.005 | -        |
| <b>HDL-C</b>         |    |           |                |   |   |      |      |      |      |       |          |       |          |
| rs6546578            | 2  | 70346714  | <i>PCYOX1</i>  | G | A | 0.32 | 1.42 | 1.43 | 1.49 | 0.02  | 6.47E-05 | 0.003 | 1.21E-02 |
| rs6546579            | 2  | 70346786  | <i>PCYOX1</i>  | A | C | 0.32 | 1.42 | 1.43 | 1.50 | 0.02  | 7.84E-05 | 0.003 | 1.33E-02 |
| rs3088063            | 19 | 40529916  | <i>CD22</i>    | G | A | 0.06 | 1.42 | 1.50 | 1.58 | 0.04  | 9.55E-05 | 0.003 | 1.10E-03 |
| rs6018424            | 20 | 45420391  | <i>RPL35AP</i> | G | A | 0.19 | 1.42 | 1.45 | 1.54 | 0.03  | 7.73E-05 | 0.004 | 1.67E-03 |
| <b>ApoAI</b>         |    |           |                |   |   |      |      |      |      |       |          |       |          |
| rs4953019            | 2  | 43896897  | <i>ABCG5</i>   | G | A | 0.07 | 2.15 | 2.09 | 2.05 | -0.05 | 5.99E-05 | 0.003 | -        |
| rs4437632            | 8  | 69014046  | <i>PREX2</i>   | A | C | 0.27 | 2.12 | 2.15 | 2.20 | 0.03  | 6.52E-05 | 0.004 | -        |
| rs838878             | 12 | 123826598 | <i>SCARB1</i>  | G | A | 0.30 | 2.12 | 2.15 | 2.17 | 0.03  | 5.05E-05 | 0.003 | -        |
| rs12580803           | 12 | 123883200 | <i>SCARB1</i>  | A | G | 0.17 | 2.13 | 2.16 | 2.21 | 0.04  | 7.40E-05 | 0.003 | -        |
| rs3088063            | 19 | 40529916  | <i>CD22</i>    | G | A | 0.06 | 2.13 | 2.19 | 2.24 | 0.06  | 6.31E-05 | 0.004 | -        |
| rs10426830           | 19 | 40530818  | <i>CD22</i>    | C | A | 0.06 | 2.13 | 2.19 | 2.40 | 0.06  | 4.87E-05 | 0.003 | -        |
| <b>Triglycerides</b> |    |           |                |   |   |      |      |      |      |       |          |       |          |

|            |    |           |                  |   |   |      |      |      |      |       |                       |       |          |
|------------|----|-----------|------------------|---|---|------|------|------|------|-------|-----------------------|-------|----------|
| rs1049817  | 2  | 27404471  | <i>GTF3C2</i>    | A | G | 0.39 | 1.51 | 1.43 | 1.33 | -0.05 | 5.67E-05 <sup>#</sup> | 0.004 | 1.45E-06 |
| rs3134947  | 6  | 32253183  | <i>RNF5</i>      | G | A | 0.22 | 1.47 | 1.40 | 1.35 | -0.05 | 5.08E-05              | 0.003 | 6.21E-03 |
| rs2854275  | 6  | 32736406  | <i>HLA-DQB1</i>  | C | A | 0.14 | 1.47 | 1.38 | 1.33 | -0.07 | 4.24E-05              | 0.004 | 8.33E-04 |
| rs2781659  | 6  | 131933513 | <i>ARG1;MED3</i> | A | G | 0.32 | 1.49 | 1.43 | 1.30 | -0.05 | 4.40E-05              | 0.003 | 3.81E-03 |
| rs17108993 | 10 | 95354023  | <i>RBP4</i>      | C | G | 0.03 | 1.42 | 1.72 | 1.53 | 0.14  | 8.04E-06              | 0.004 | 1.62E-03 |
| rs163182   | 11 | 2800792   | <i>KCNQ1</i>     | C | G | 0.45 | 1.38 | 1.43 | 1.56 | 0.05  | 4.32E-05              | 0.004 | 7.37E-03 |
| rs163184   | 11 | 2803645   | <i>KCNQ1</i>     | A | C | 0.47 | 1.37 | 1.44 | 1.55 | 0.05  | 2.91E-05              | 0.004 | 1.13E-02 |
| rs2228603  | 19 | 19190924  | <i>GATAD2A</i>   | G | A | 0.08 | 1.47 | 1.33 | 1.00 | -0.09 | 1.53E-05              | 0.004 | -        |
| rs3794991  | 19 | 19471596  | <i>PBX4</i>      | G | A | 0.09 | 1.47 | 1.32 | 1.08 | -0.09 | 4.41E-06              | 0.004 | 8.48E-05 |
| rs16996148 | 19 | 19519472  | <i>PBX4</i>      | C | A | 0.08 | 1.47 | 1.31 | 1.09 | -0.09 | 1.69E-06              | 0.005 | 4.92E-05 |
| rs12610185 | 19 | 19582722  | <i>PBX4</i>      | G | A | 0.09 | 1.47 | 1.31 | 1.09 | -0.10 | 5.64E-07              | 0.005 | 2.31E-05 |
| rs10500212 | 19 | 19584215  | <i>GMIP</i>      | G | A | 0.09 | 1.47 | 1.31 | 1.09 | -0.10 | 6.79E-07              | 0.005 | 2.53E-05 |
| rs2304128  | 19 | 19607151  | <i>GMIP</i>      | C | A | 0.09 | 1.47 | 1.31 | 0.99 | -0.10 | 3.15E-07              | 0.005 | 4.23E-06 |

<sup>a</sup> P-value in replication study <0.05 <sup>b</sup> P-value in replication study <1x10<sup>-3</sup> <sup>†</sup> P-value in replication study <1x10<sup>-5</sup>

<sup>c</sup> HMZ, homozygote ;<sup>d</sup> HTZ, heterozygote      Highlighted in bold are those SNPs which showed significant replication in the meta-analyses

LDL-C, low density lipoprotein –cholesterol; ApoB, apolipoprotein B, HDL-C, high density lipoprotein –cholesterol, ApoAI, apolipoprotein AI;

Chr, chromosome , BP, base pair; MAF, minor allele frequency
